# Supplementary material
Source: publisher figshare collection journal article supplement (https://acs.figshare.com/ndownloader/files/4053859)

Cu-Catalyzed Synthesis of Diaryl Thioethers and *S*-Cycles by Reaction of Aryl  
Iodides with Carbon Disulfide in the Presence of DBU

Peng Zhao, Hang Yin, Hongxin Gao, Chanjuan Xi\*<sup>a,b</sup>

Key Laboratory of Bioorganic Phosphorus Chemistry & Chemical Biology (Ministry  
of Education), Department of Chemistry, Tsinghua University, Beijing 100084, China

<sup>b</sup>State Key Laboratory of Elemento-Organic Chemistry, Nankai University, Tianjin  
300071, China

List of the contents:

|                                                                  |     |
|------------------------------------------------------------------|-----|
| 1. Copies of <sup>1</sup> H and <sup>13</sup> C NMR Spectra..... | S2  |
| 2. X-ray Crystal Structure of <b>2d</b> .....                    | S58 |

## 1. Copies of $^1\text{H}$ and $^{13}\text{C}$ NMR Spectra

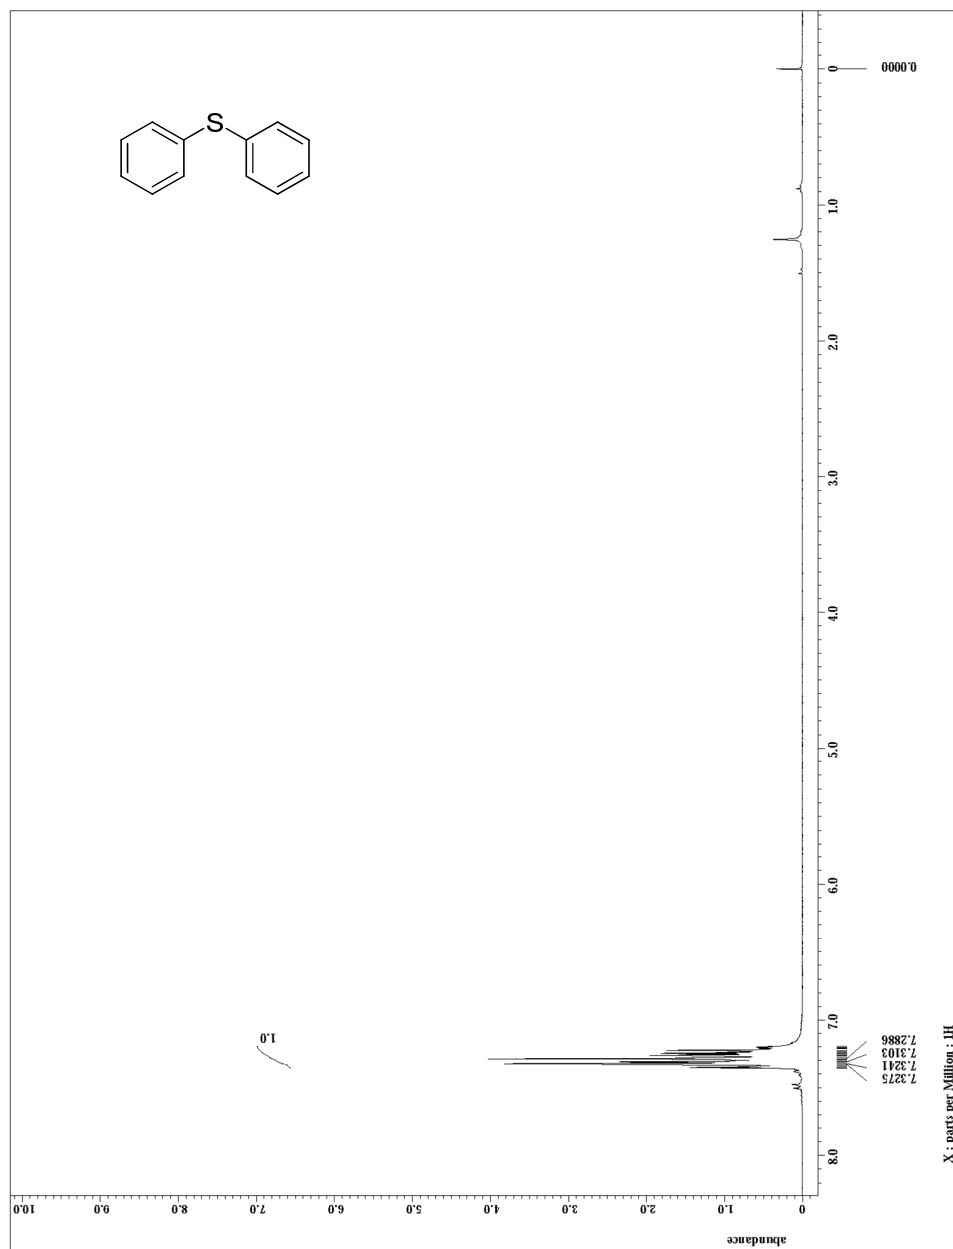

$^1\text{H}$  NMR of Compound **2a**

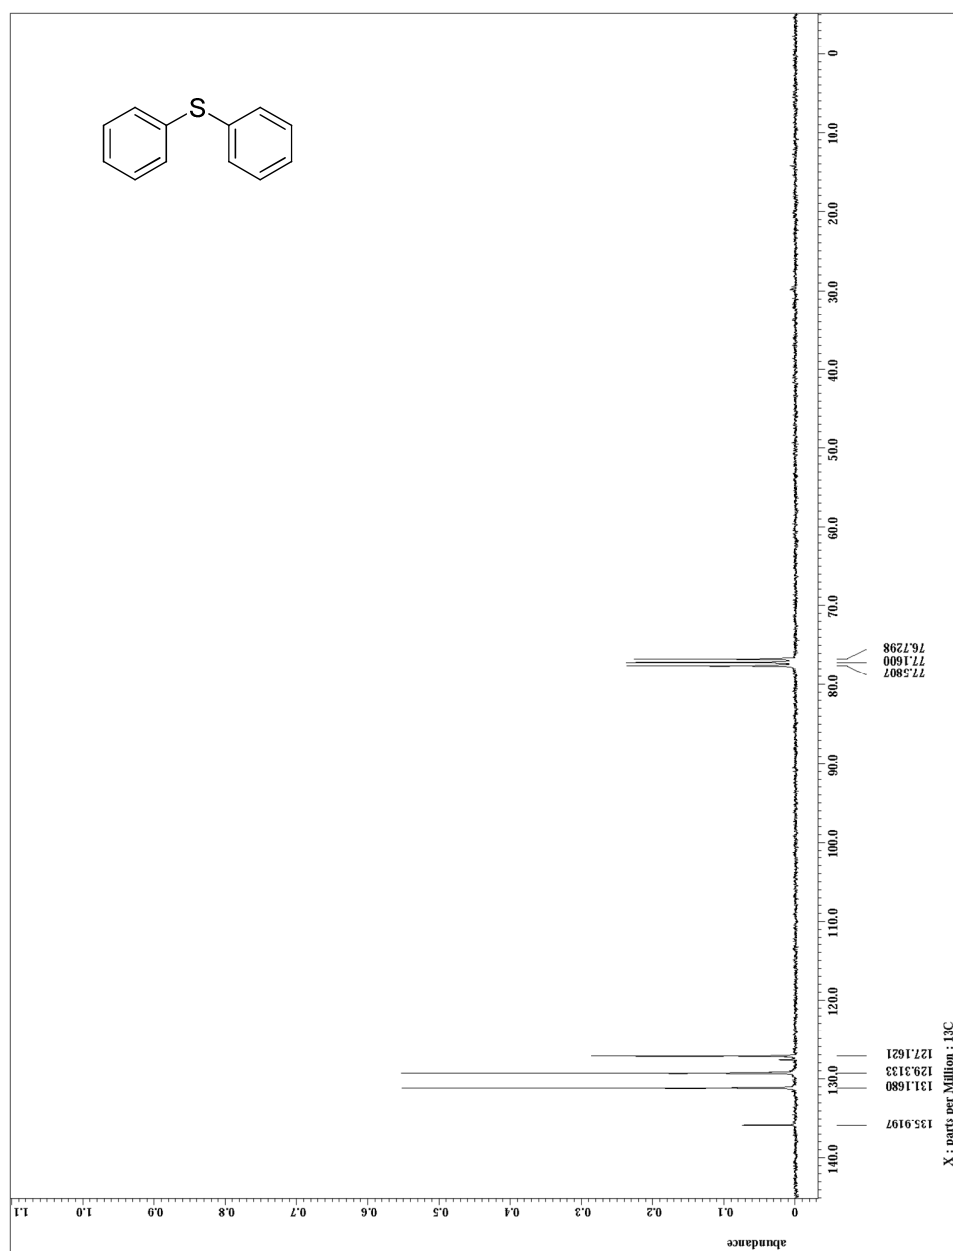

$^{13}\text{C}$  NMR of Compound **2a**

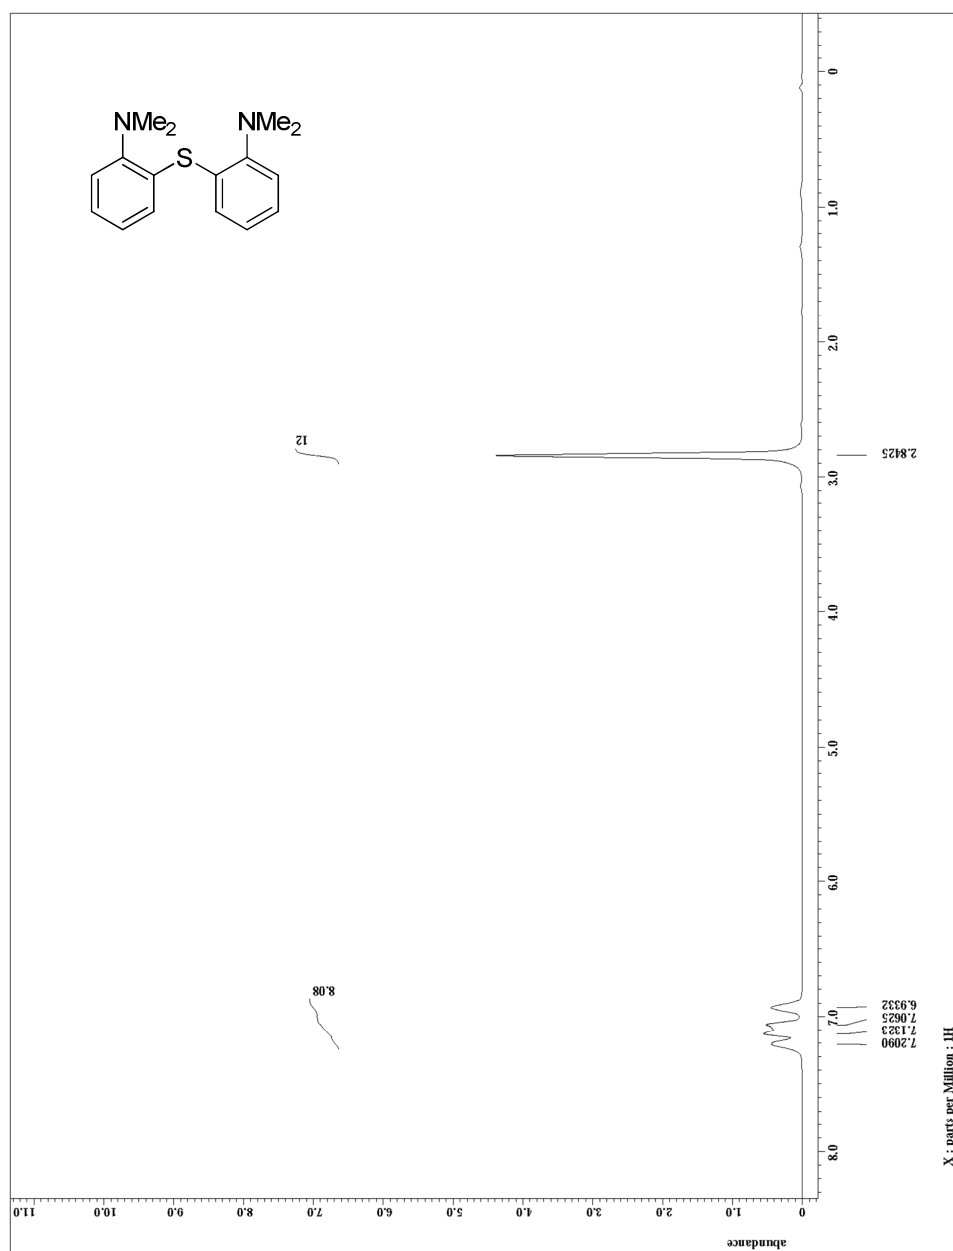

$^1\text{H}$  NMR of Compound **2b**

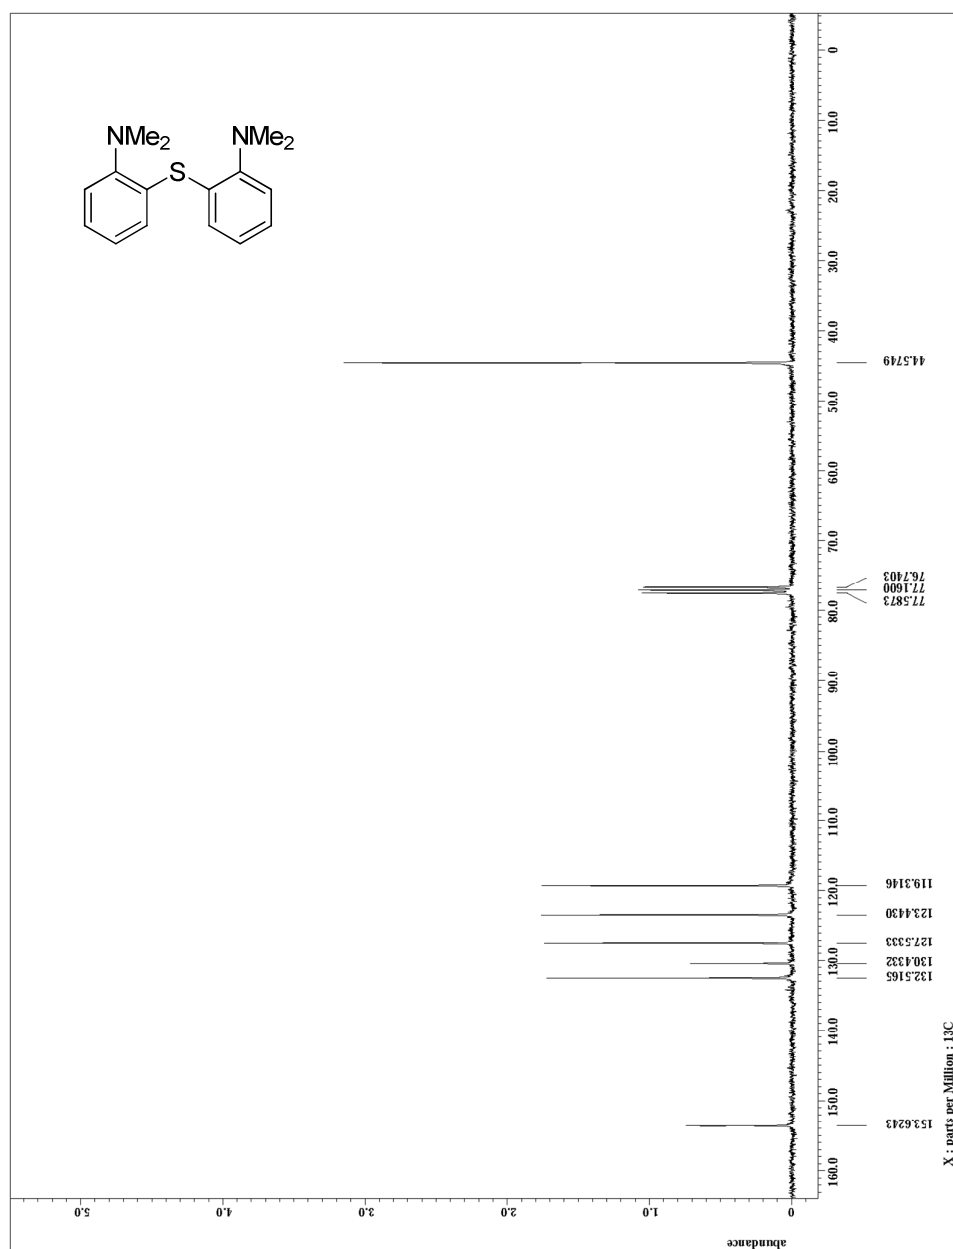

$^{13}\text{C}$  NMR of Compound **2b**

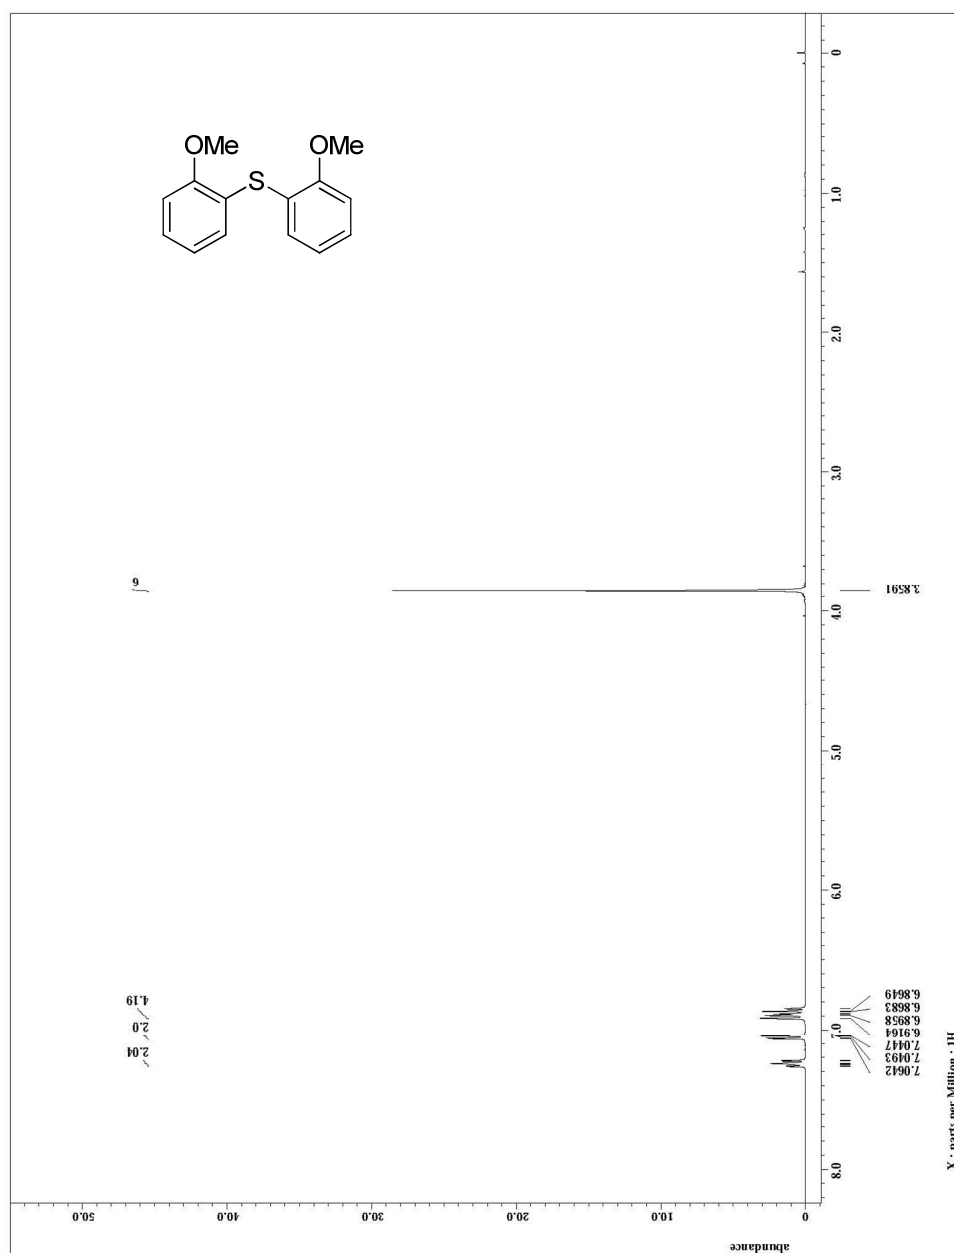

$^1\text{H}$  NMR of Compound **2c**

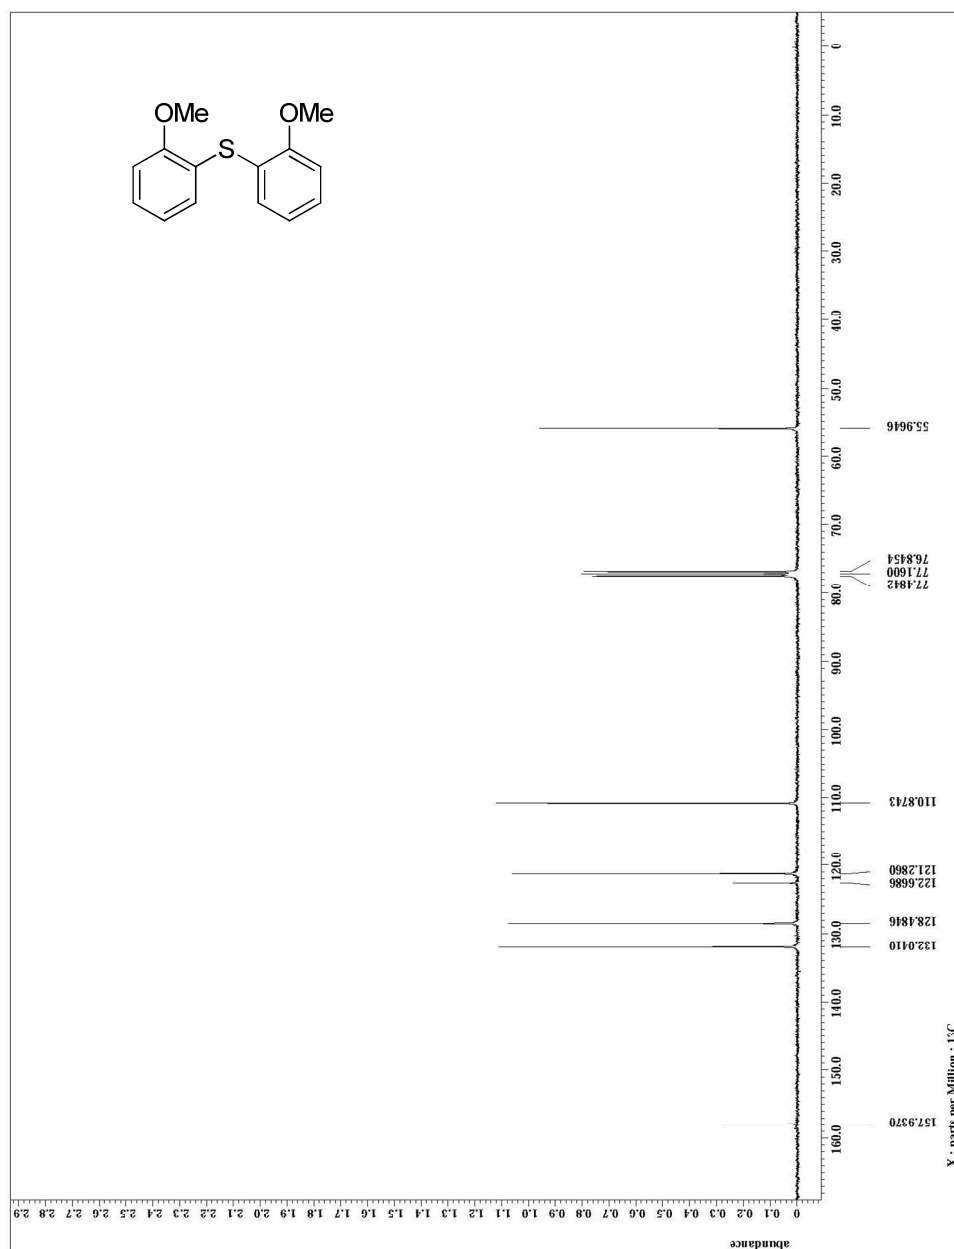

$^{13}\text{C}$  NMR of Compound 2c

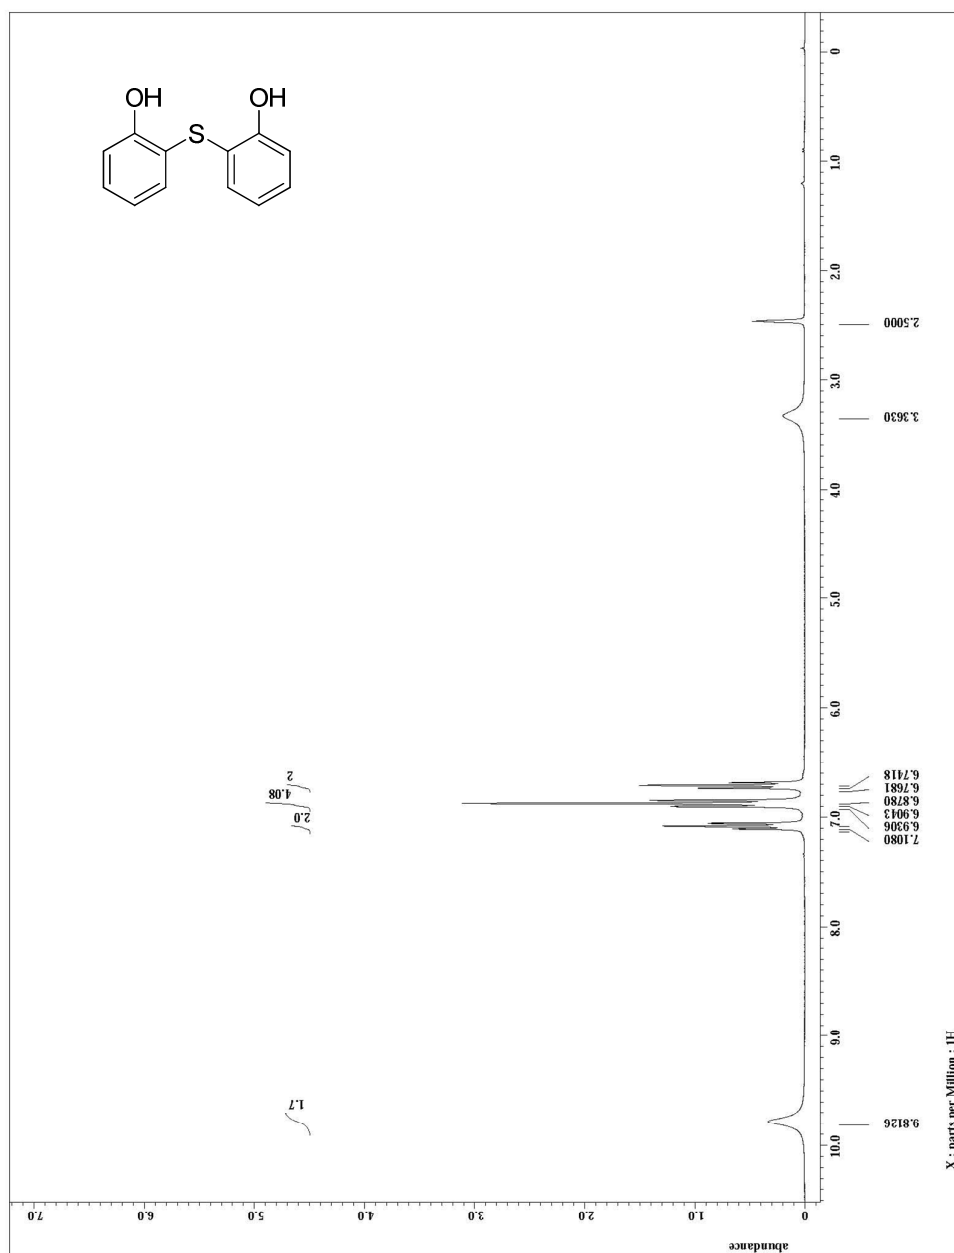

$^1\text{H}$  NMR of Compound **2d**



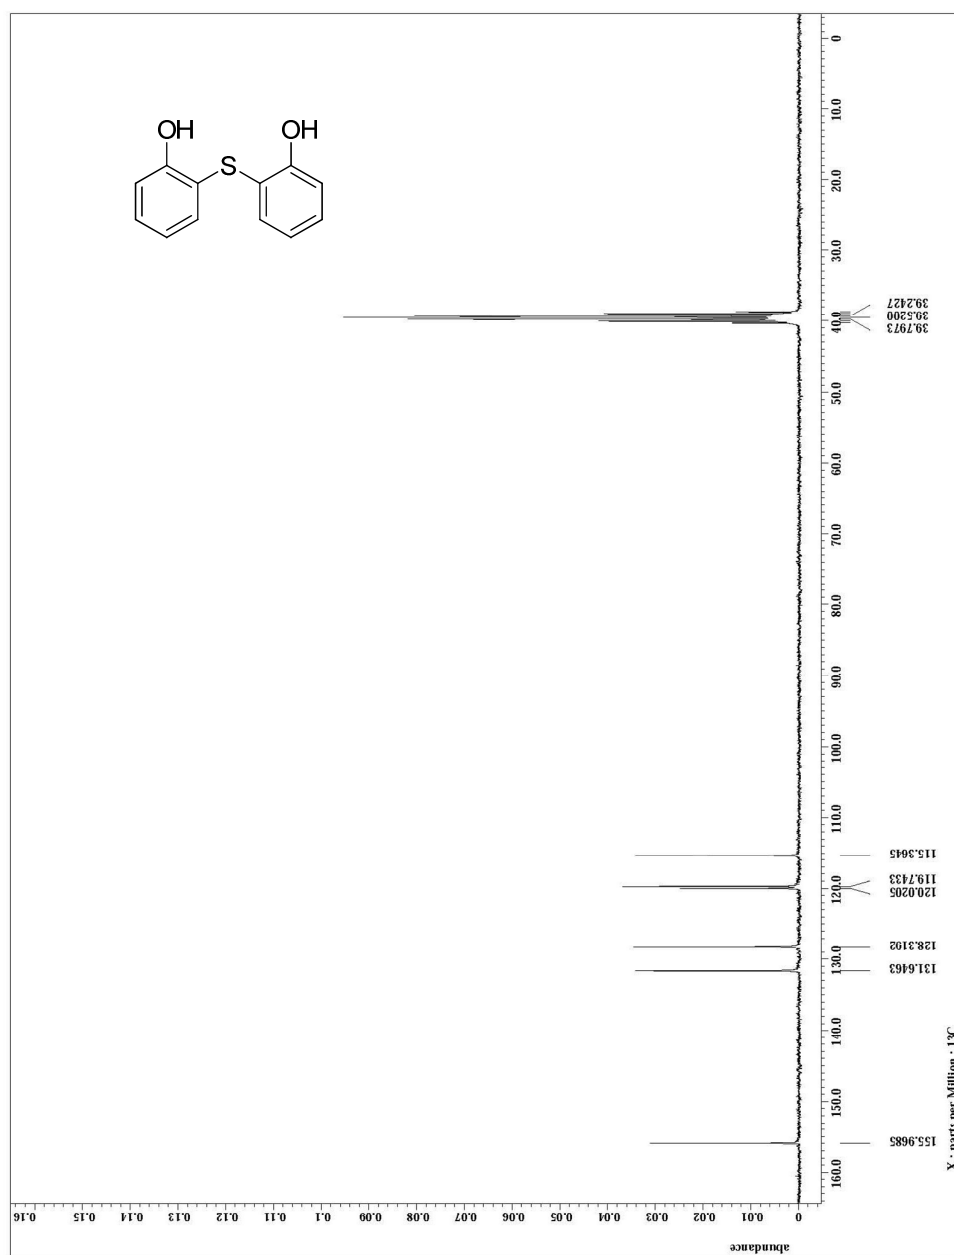

$^{13}\text{C}$  NMR of Compound **2d**

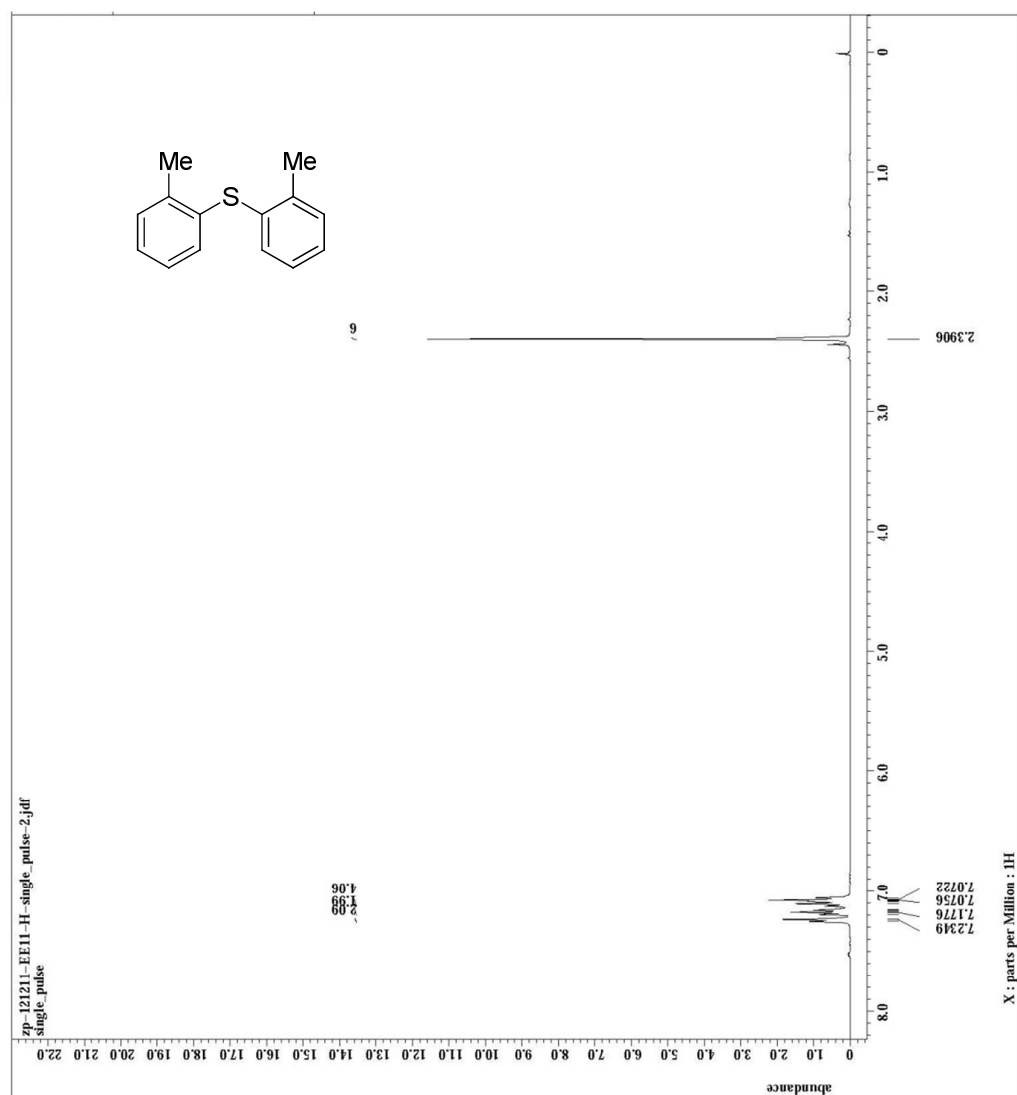

<sup>1</sup>H NMR of Compound 2e

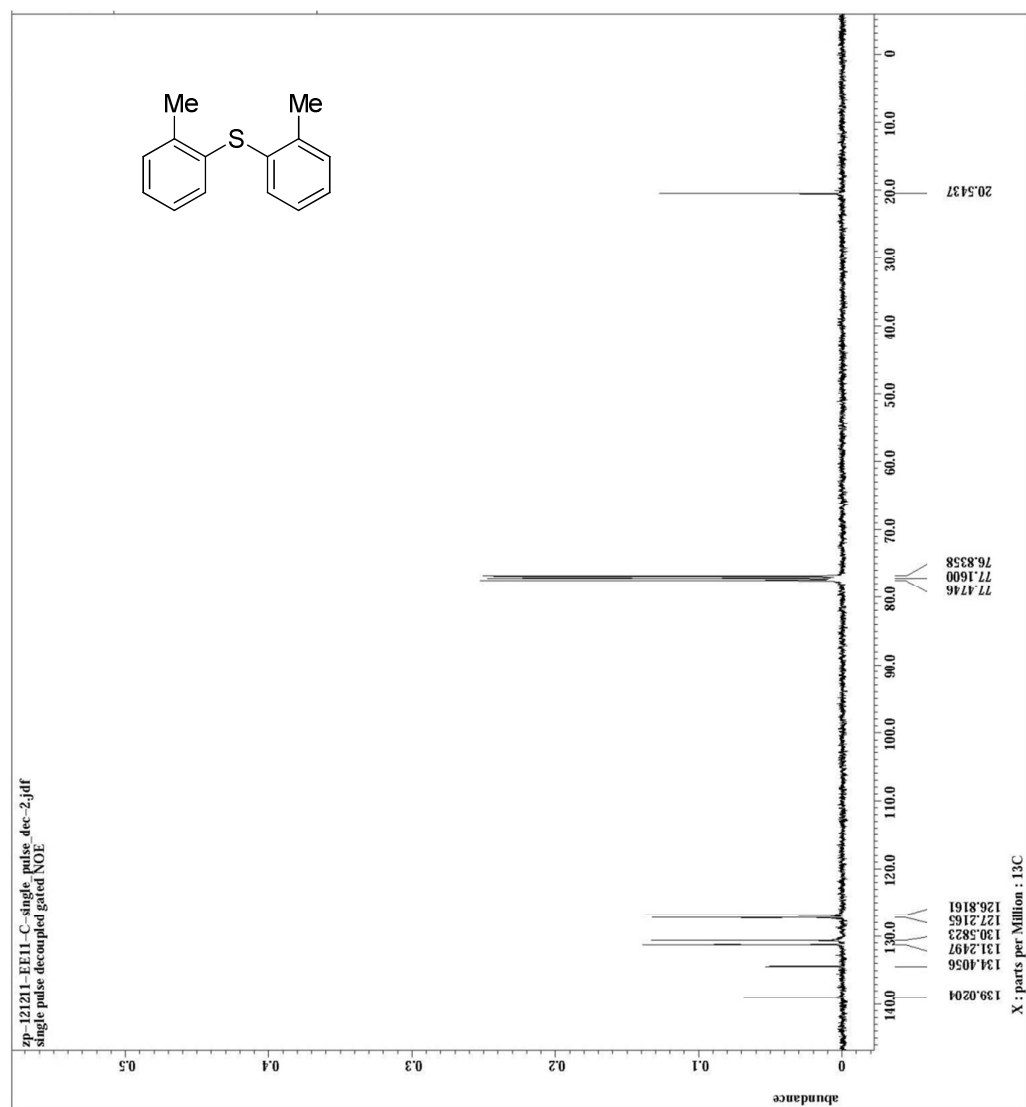

$^{13}\text{C}$  NMR of Compound **2e**

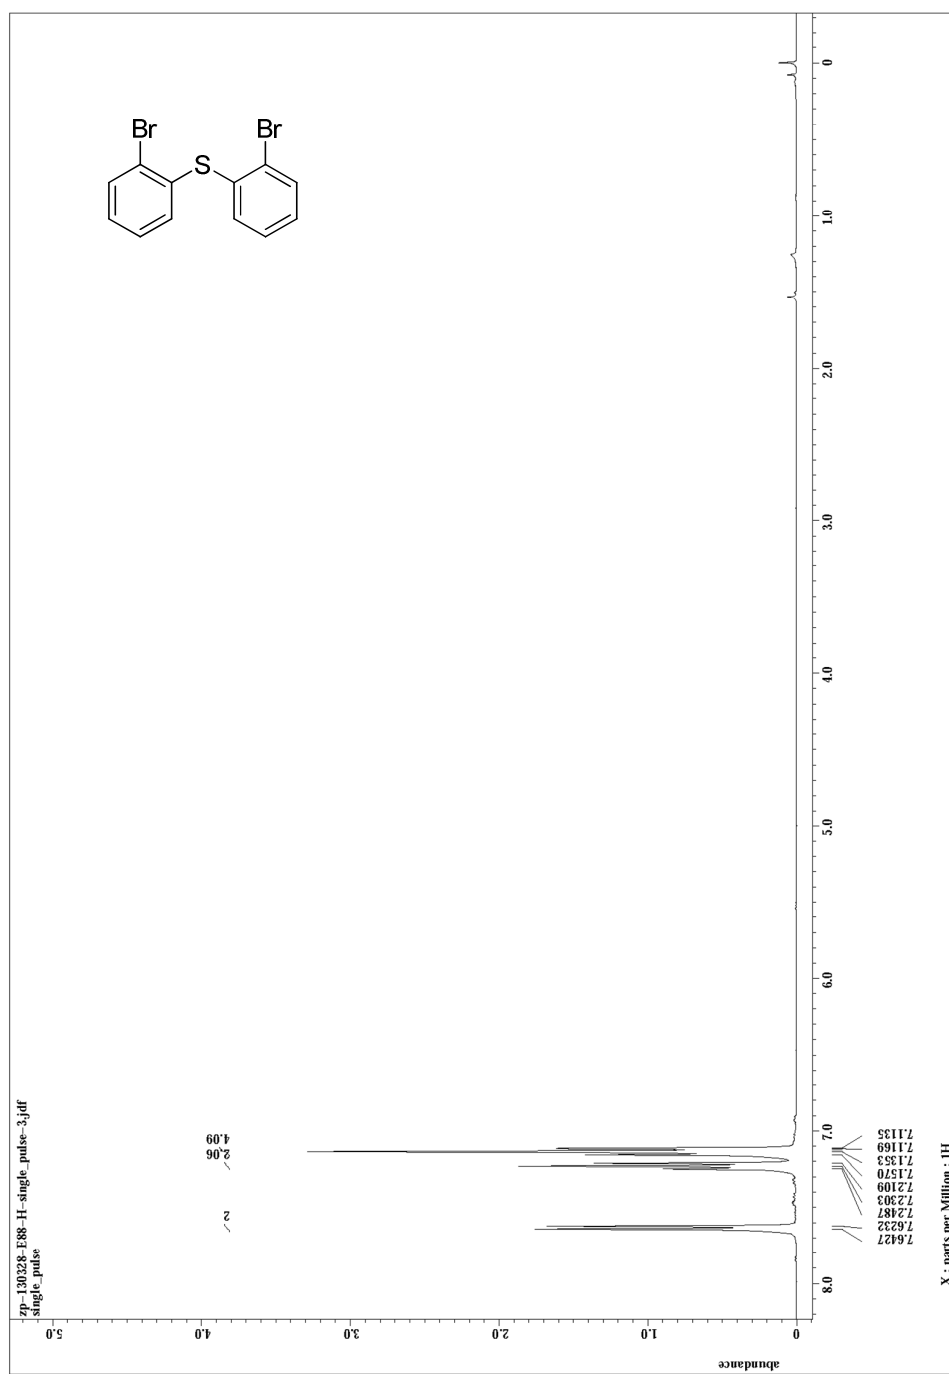

<sup>1</sup>H NMR of Compound 2f

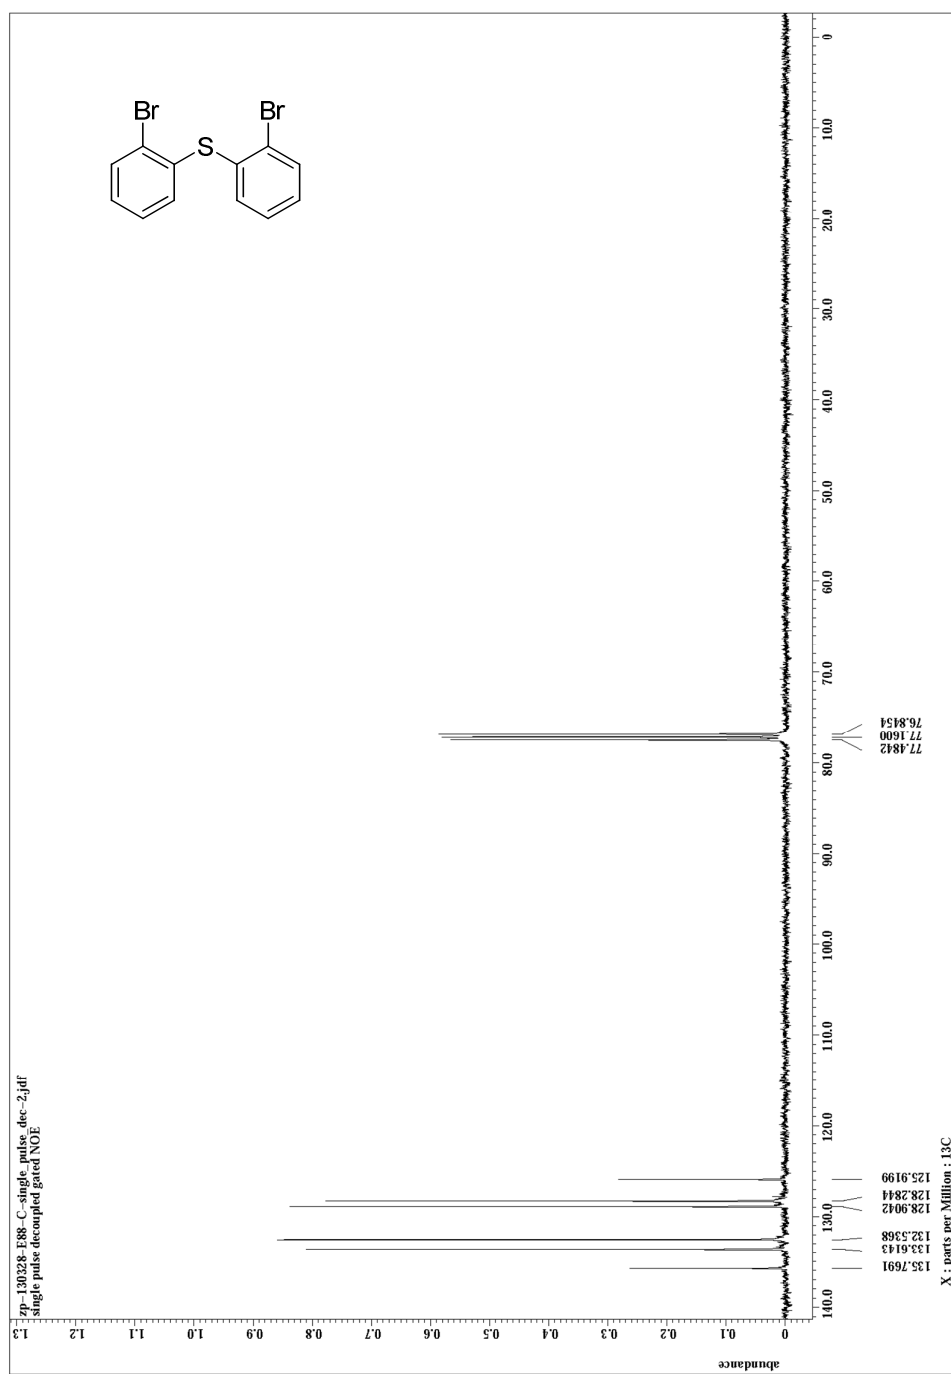

$^{13}\text{C}$  NMR of Compound 2f

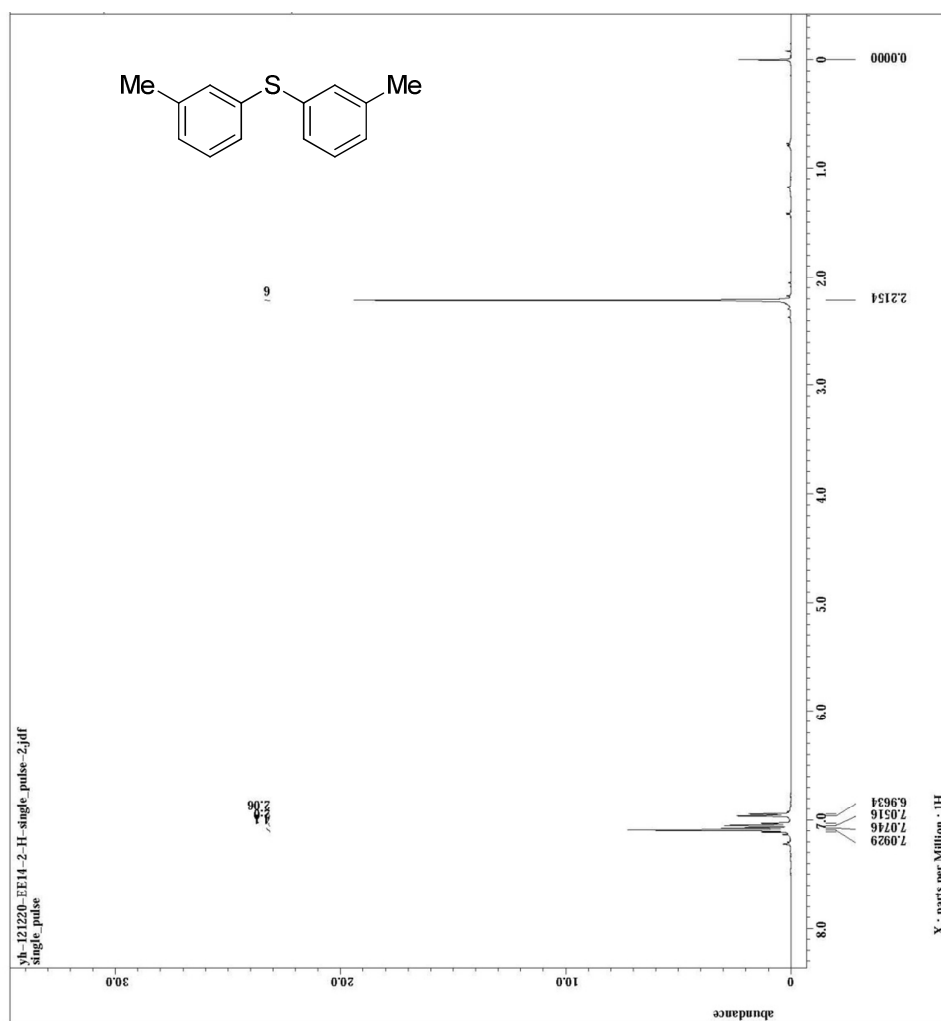

$^1\text{H}$  NMR of Compound **2g**

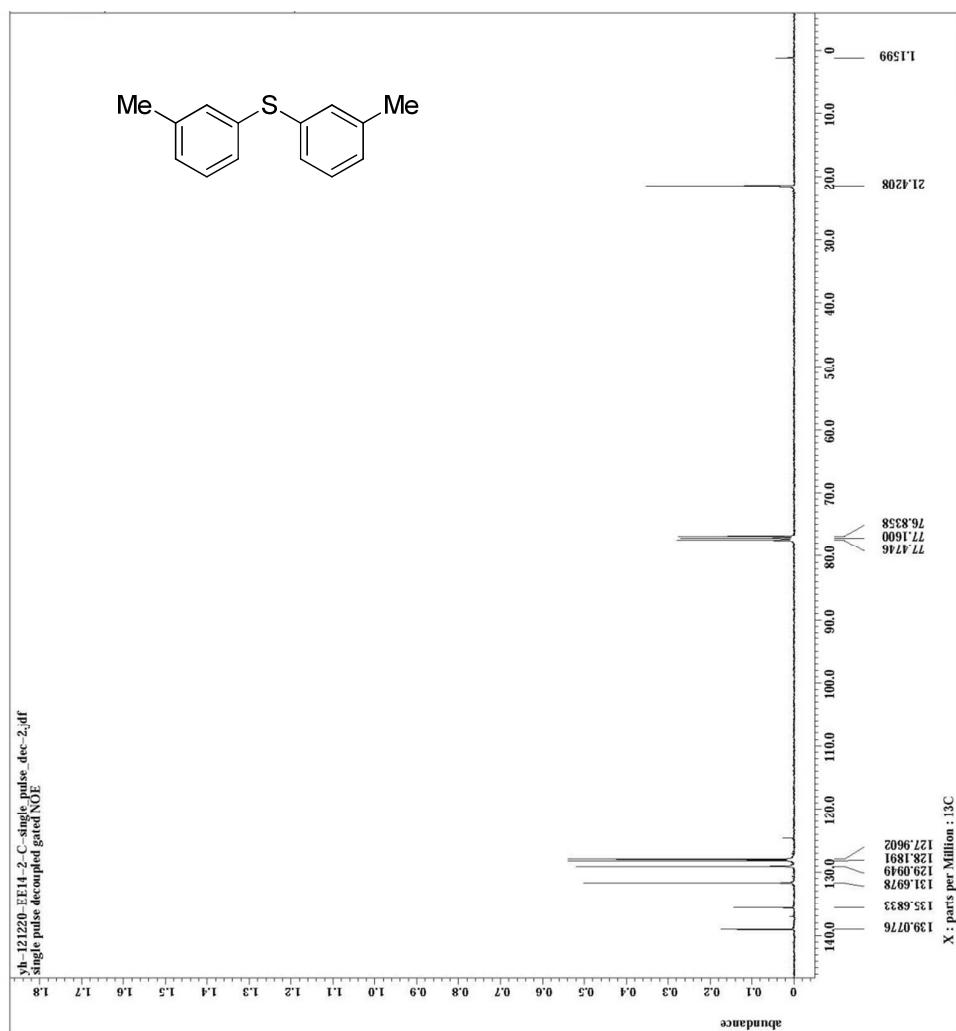

$^{13}\text{C}$  NMR of Compound **2g**

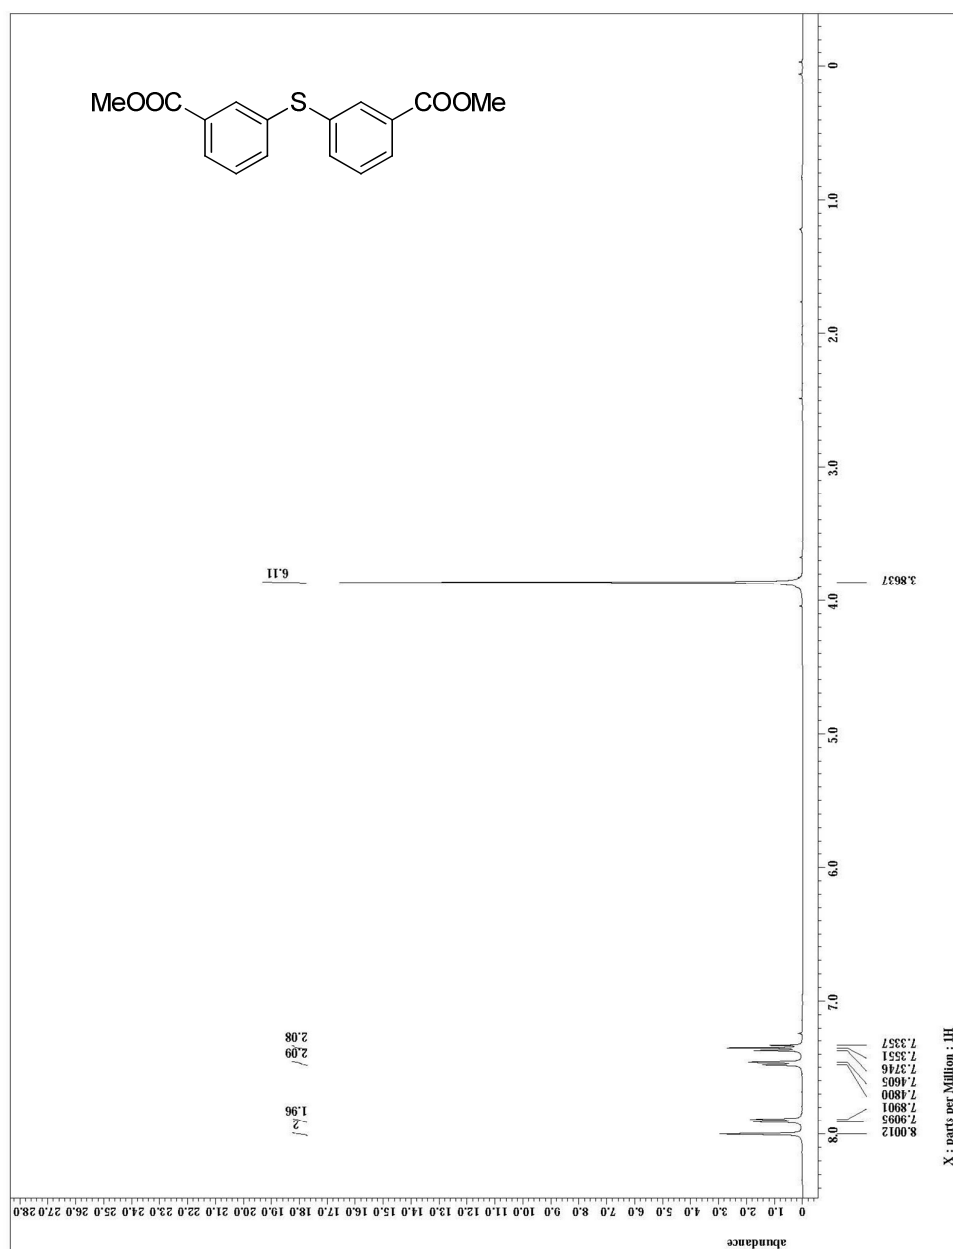

<sup>1</sup>H NMR of Compound **2h**



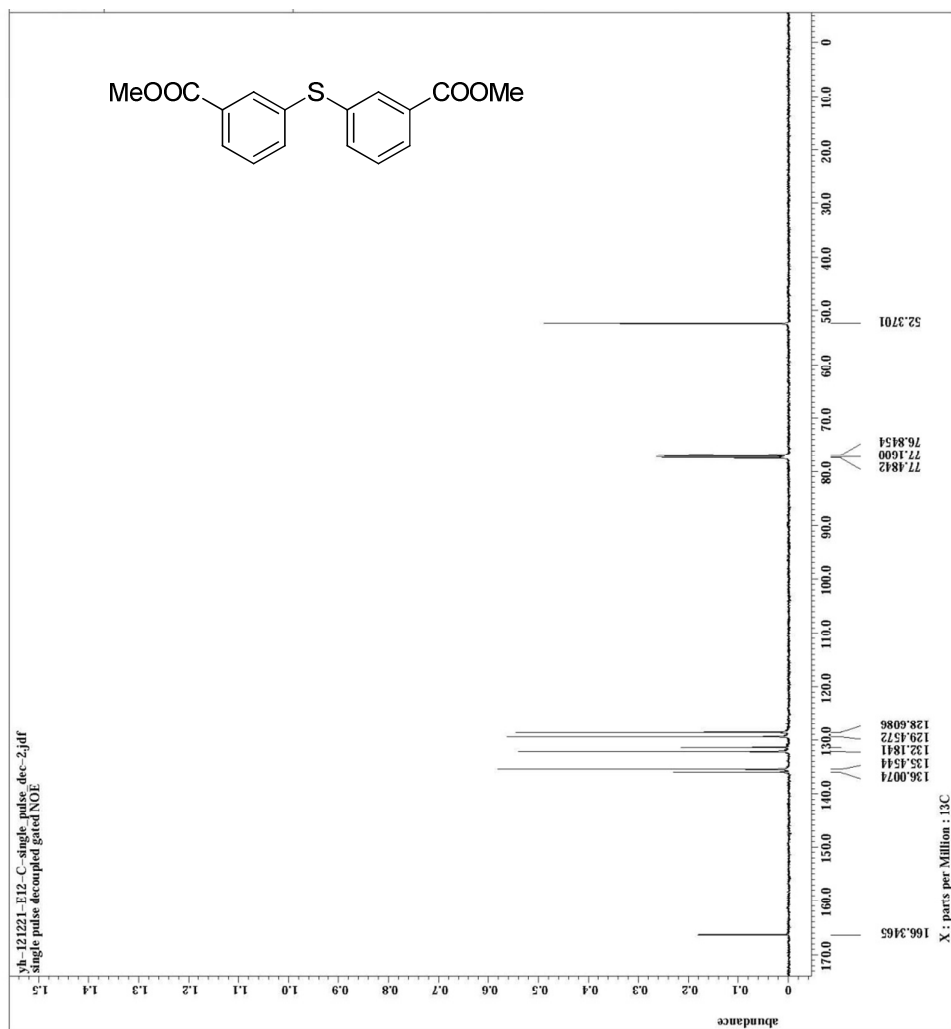

<sup>13</sup>C NMR of Compound **2h**

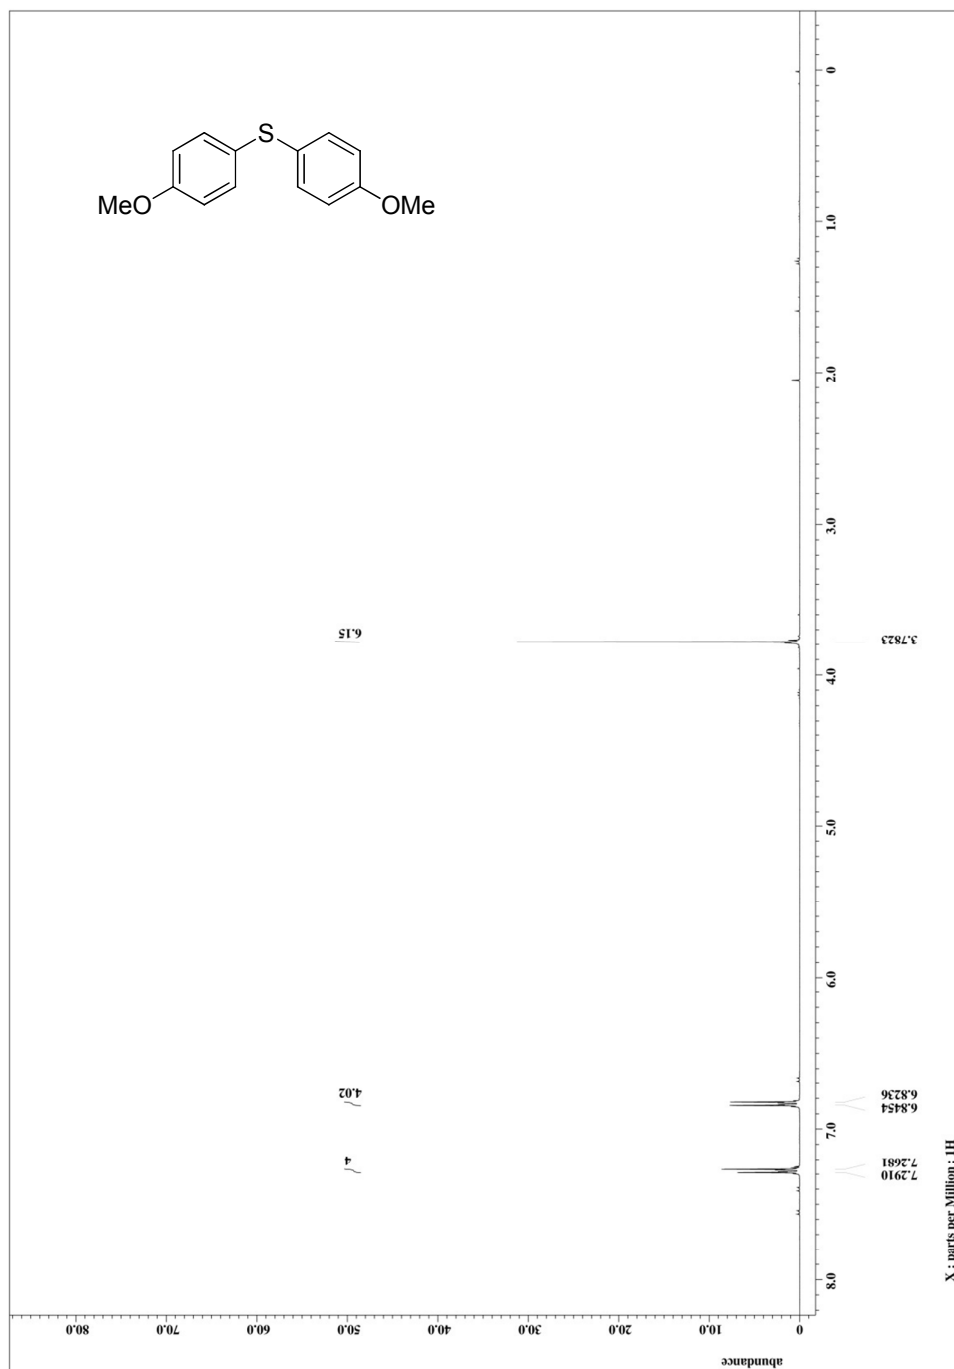

<sup>1</sup>H NMR of Compound **2i**

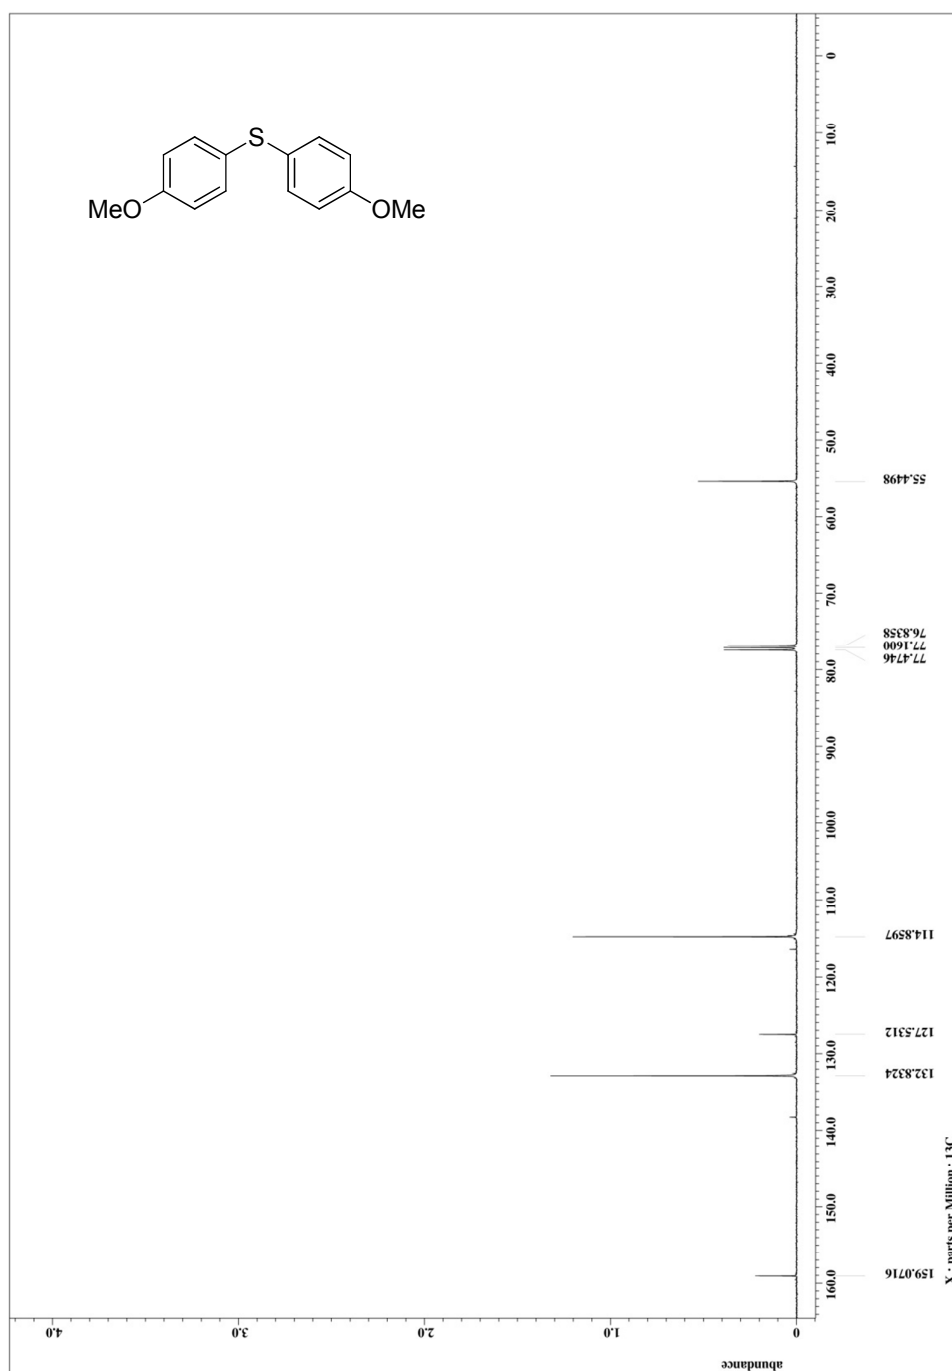

$^{13}\text{C}$  NMR of Compound **2i**

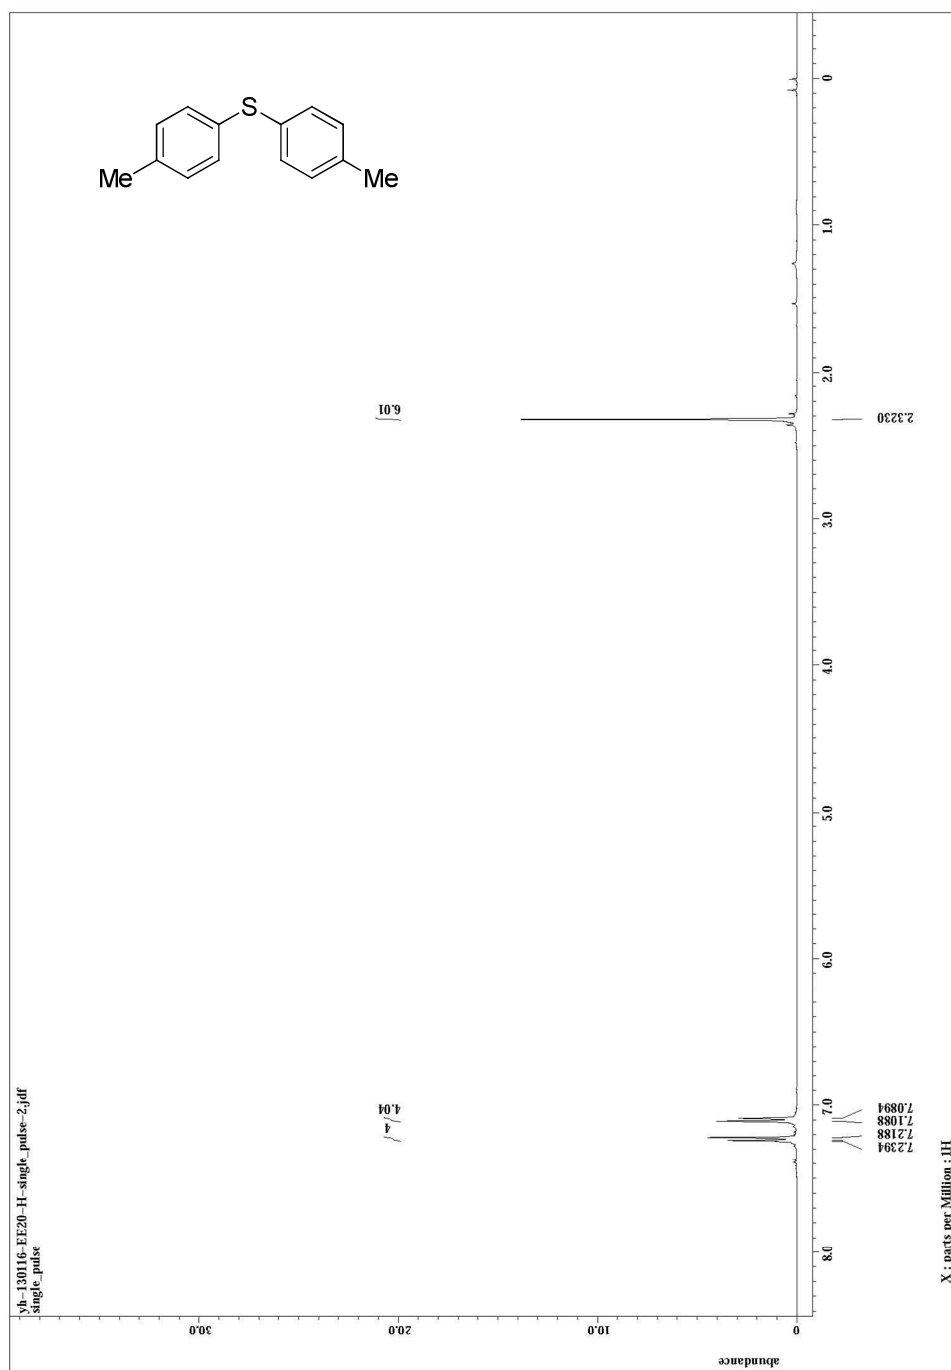

$^1\text{H}$  NMR of Compound 2j

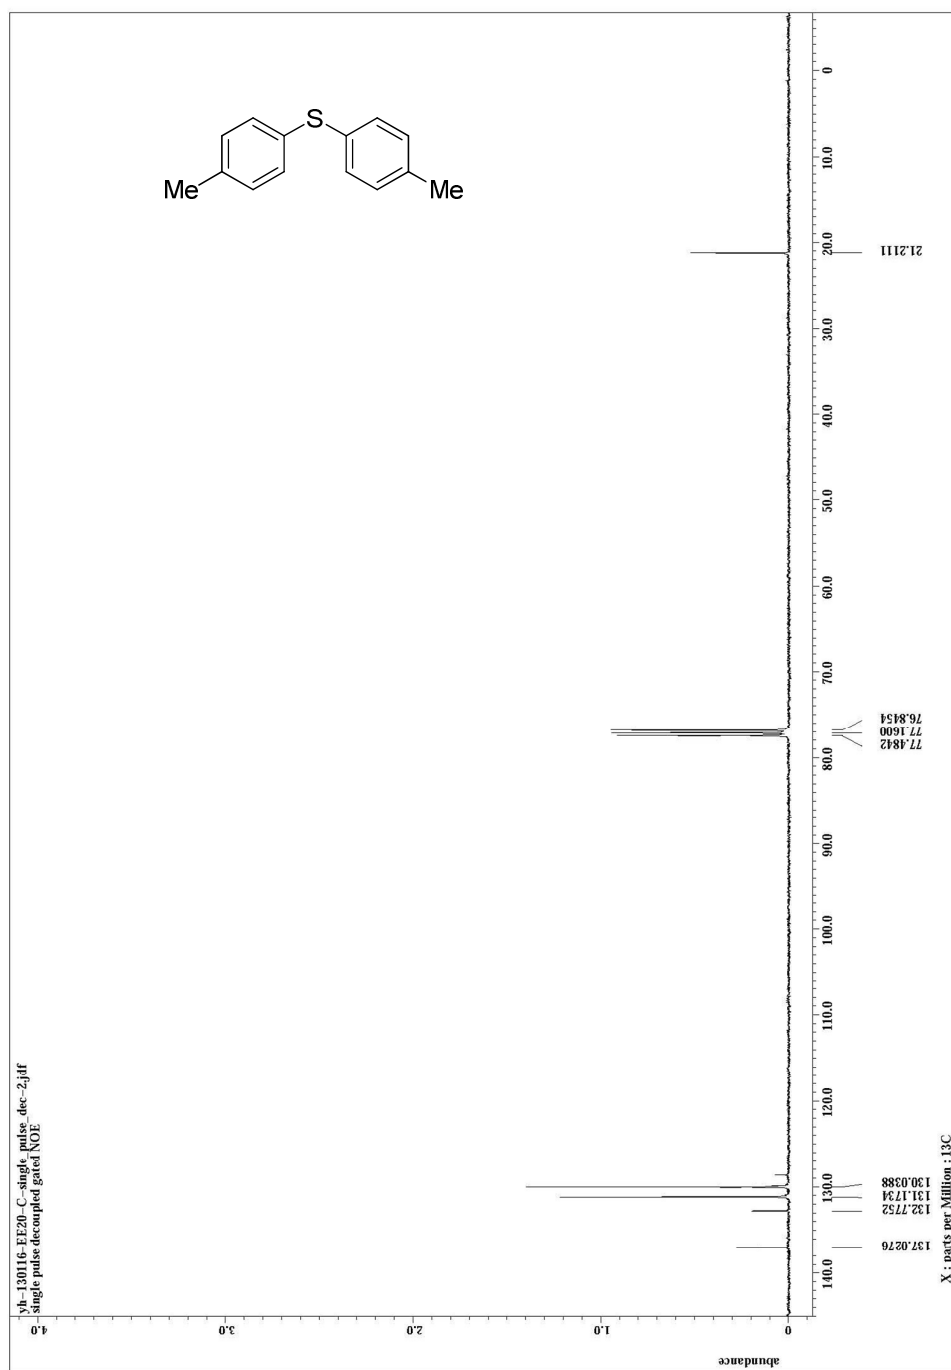

$^{13}\text{C}$  NMR of Compound 2j

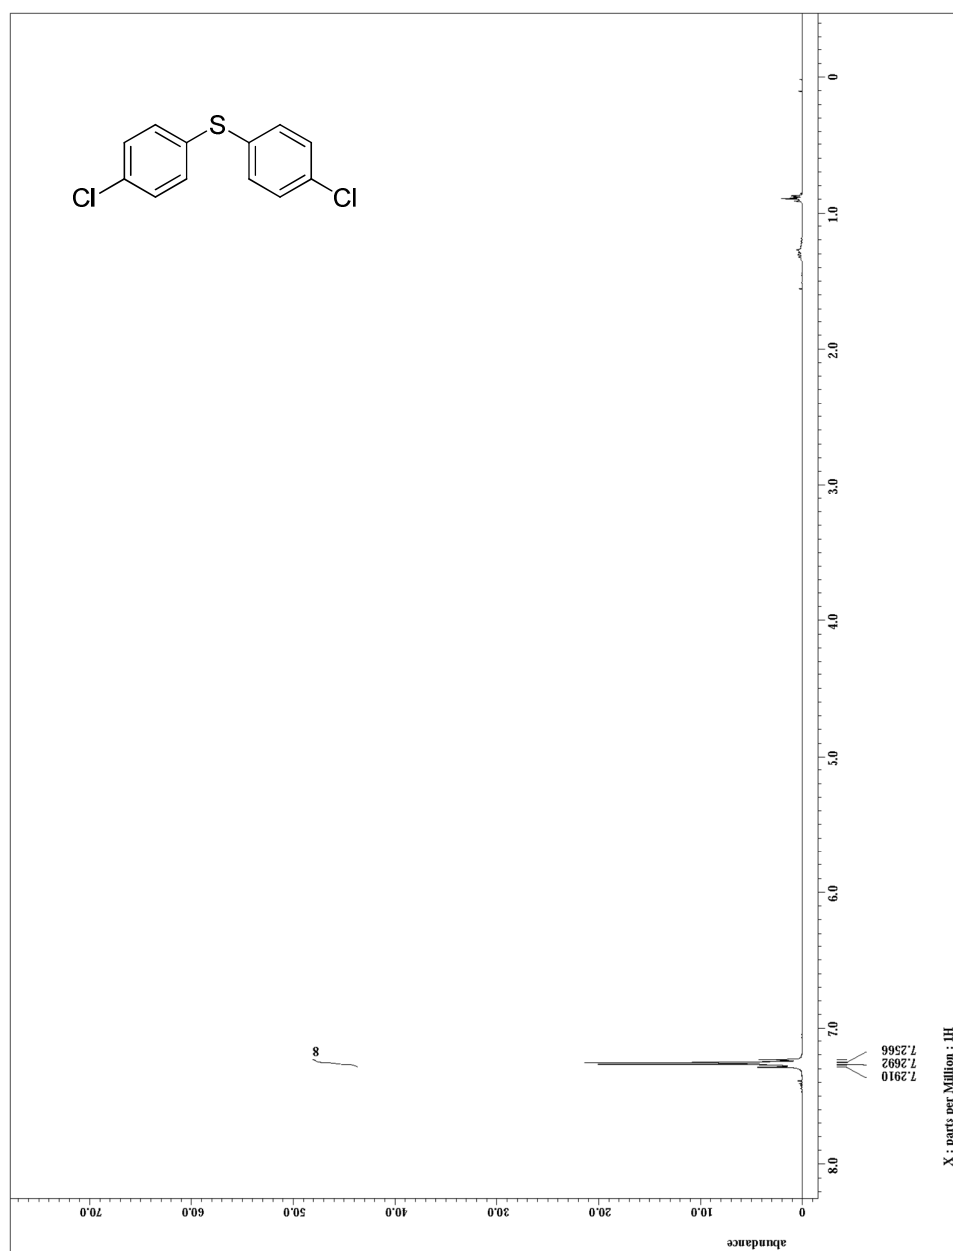

$^1\text{H}$  NMR of Compound **2k**

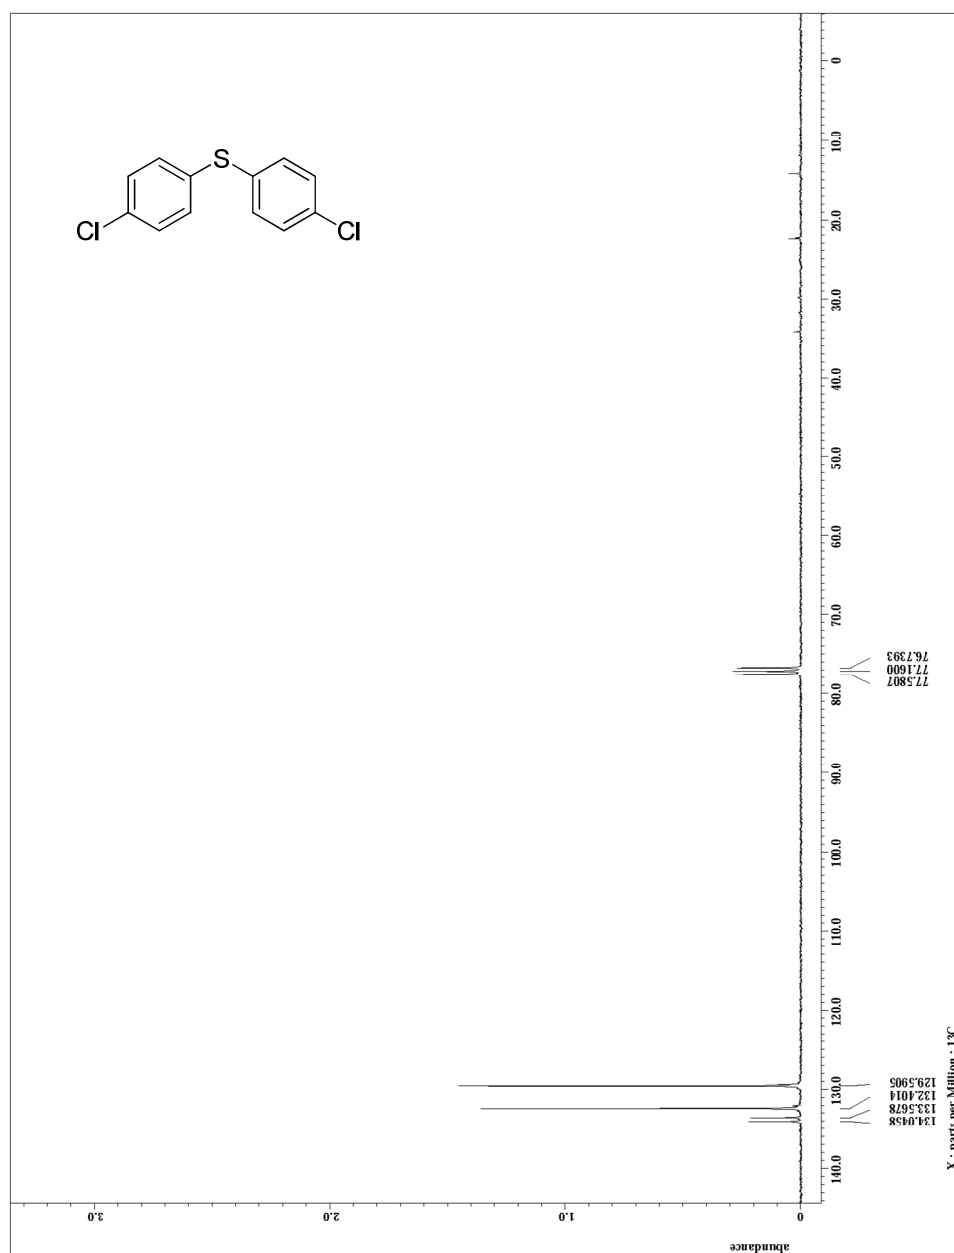

$^{13}\text{C}$  NMR of Compound **2k**

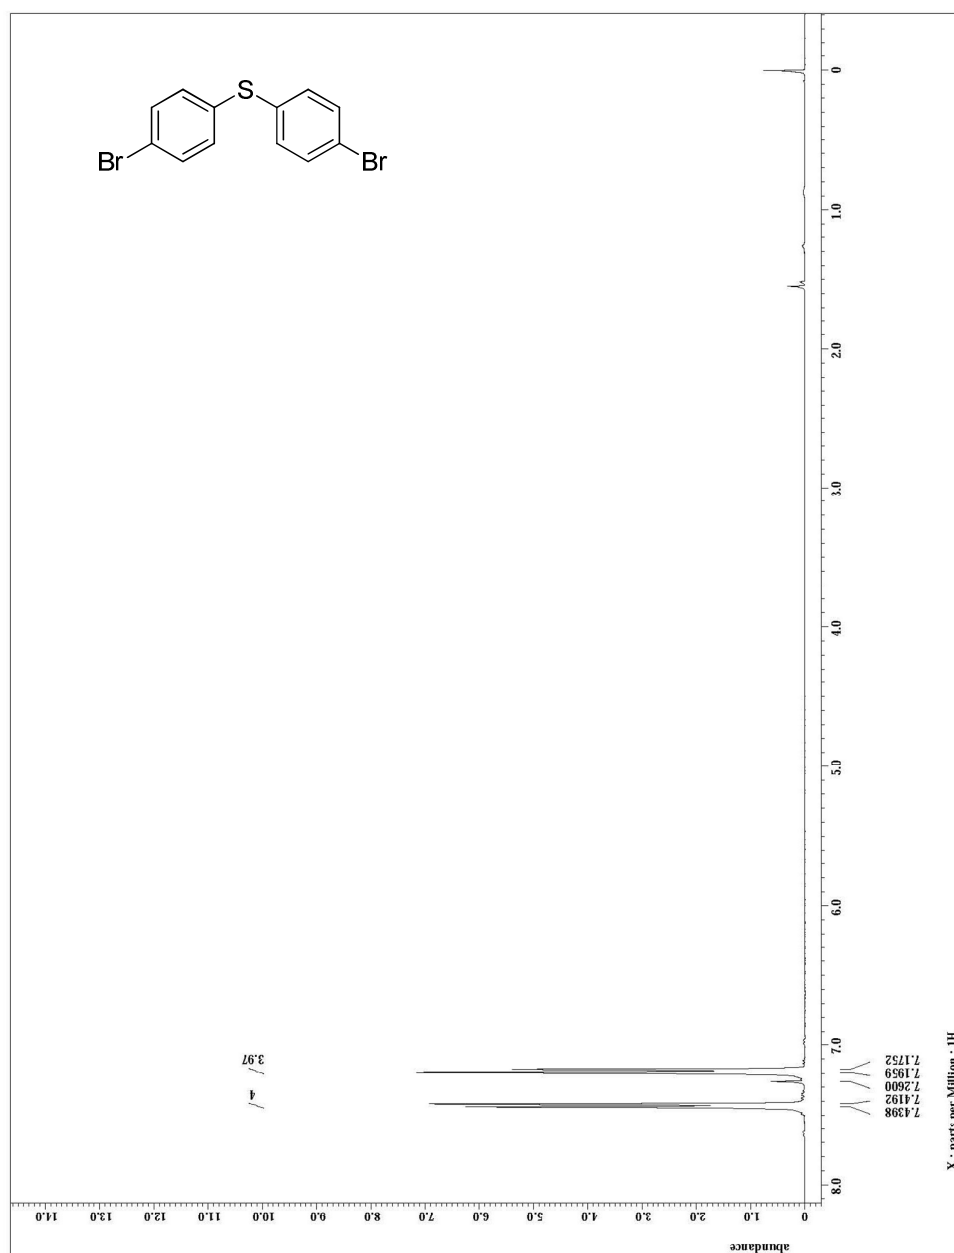

$^1\text{H}$  NMR of Compound 2I



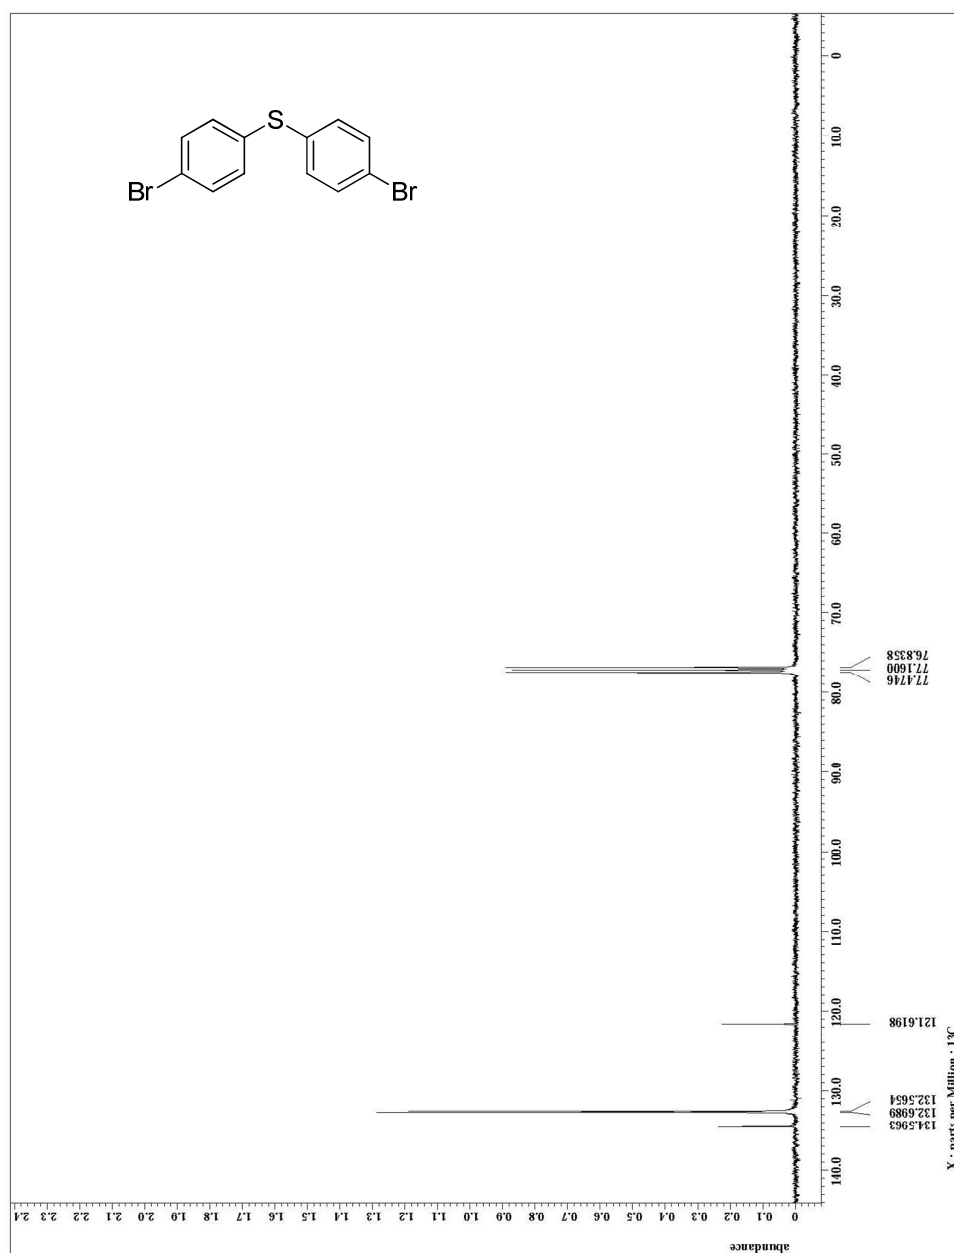

$^{13}\text{C}$  NMR of Compound **21**

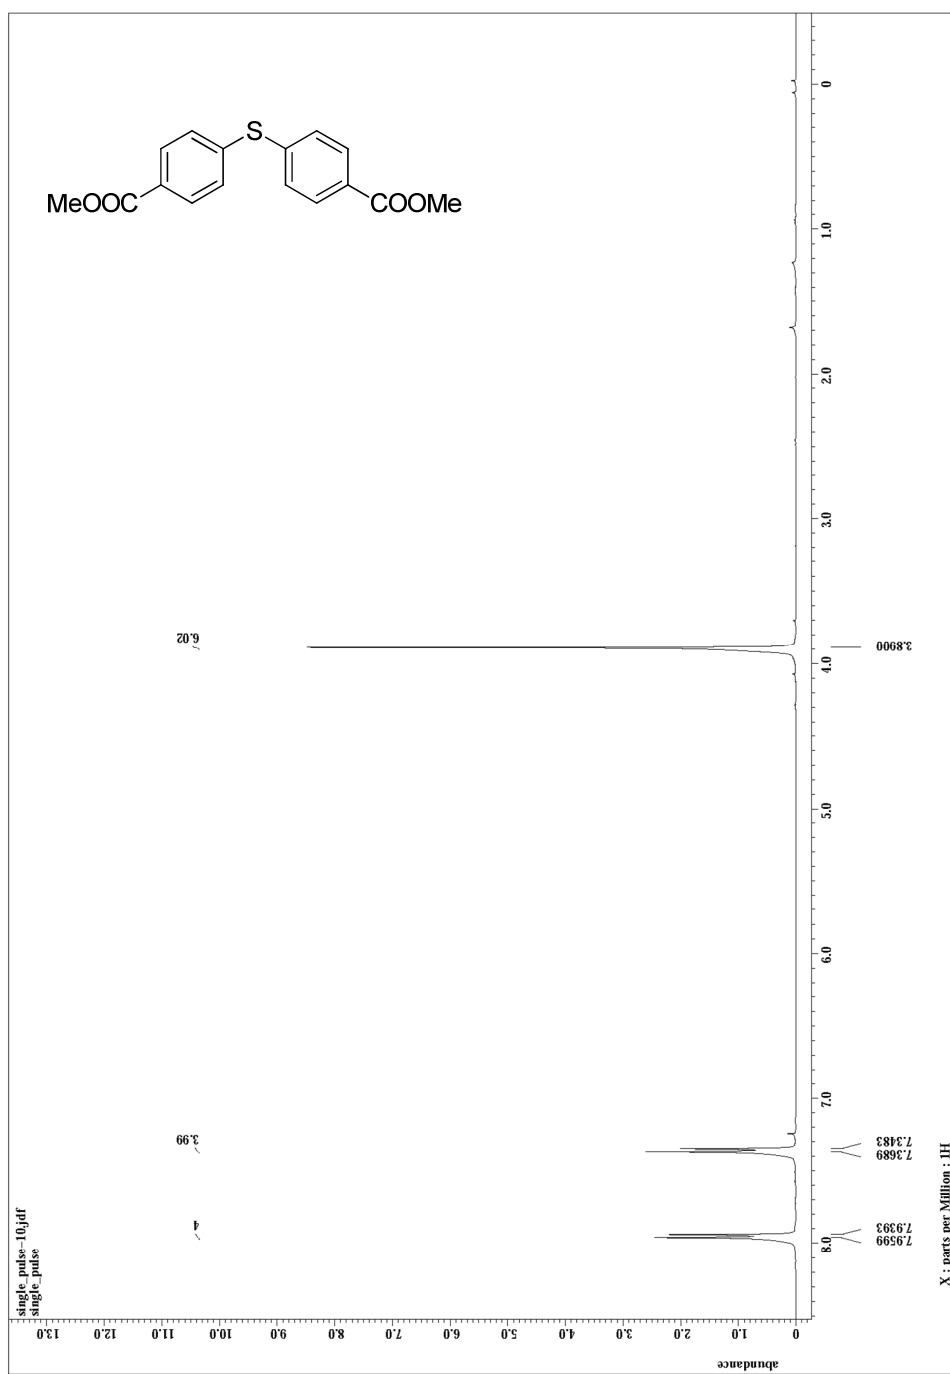

$^1\text{H}$  NMR of Compound **2m**

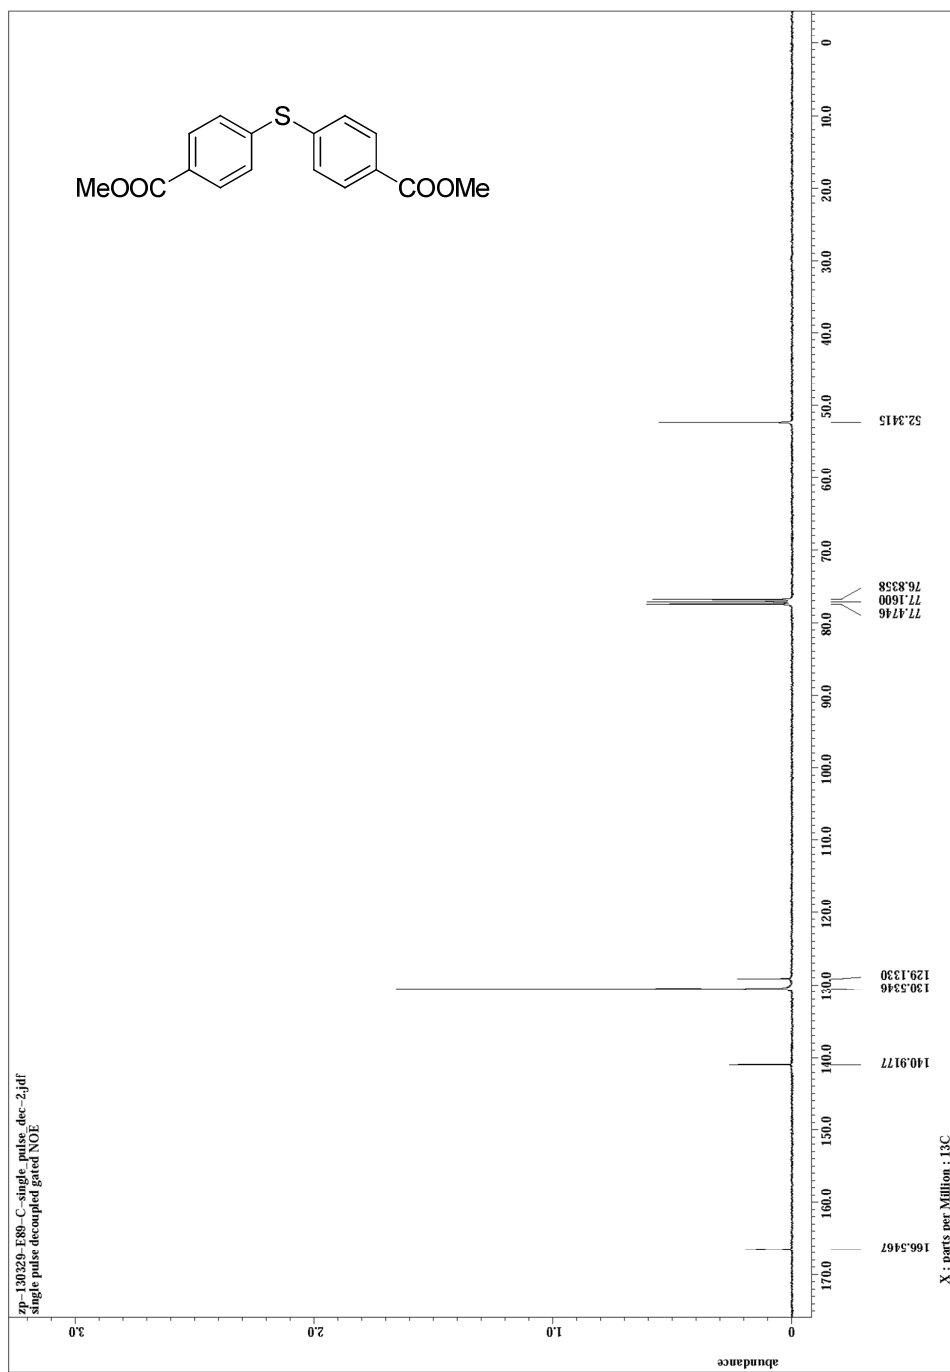

<sup>13</sup>C NMR of Compound 2m

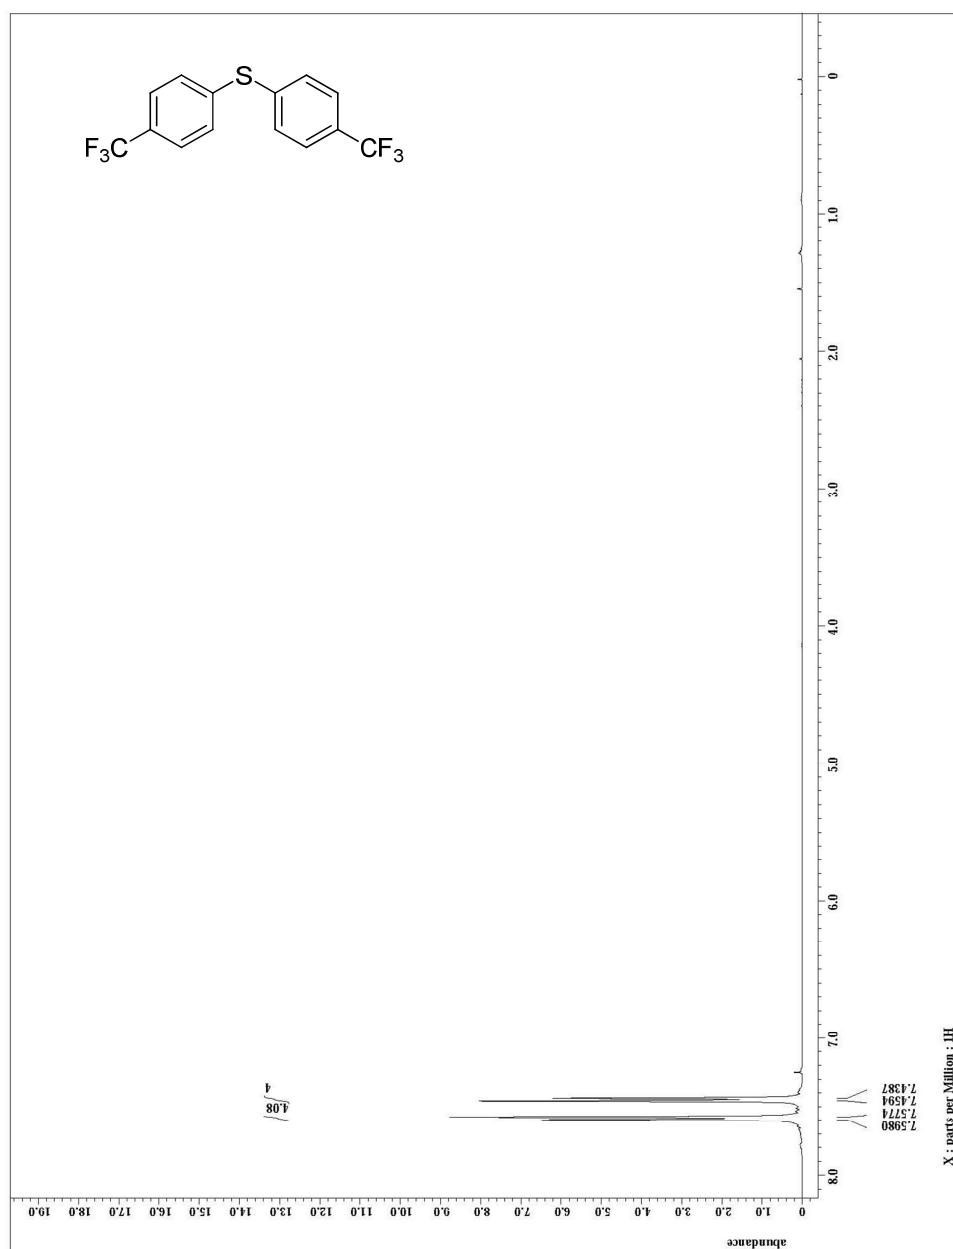

$^1\text{H}$  NMR of Compound **2n**

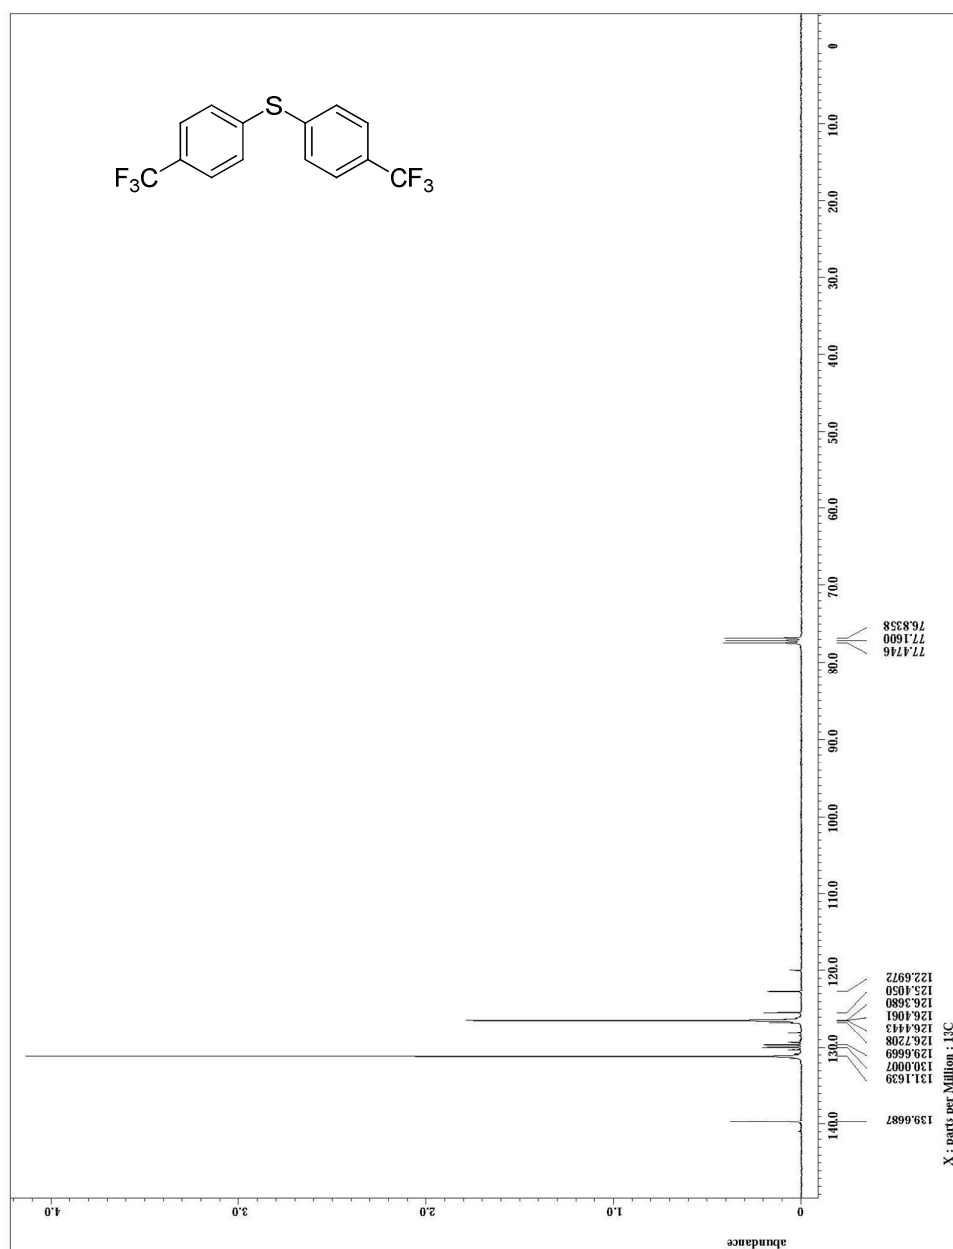

$^{13}\text{C}$  NMR of Compound **2n**

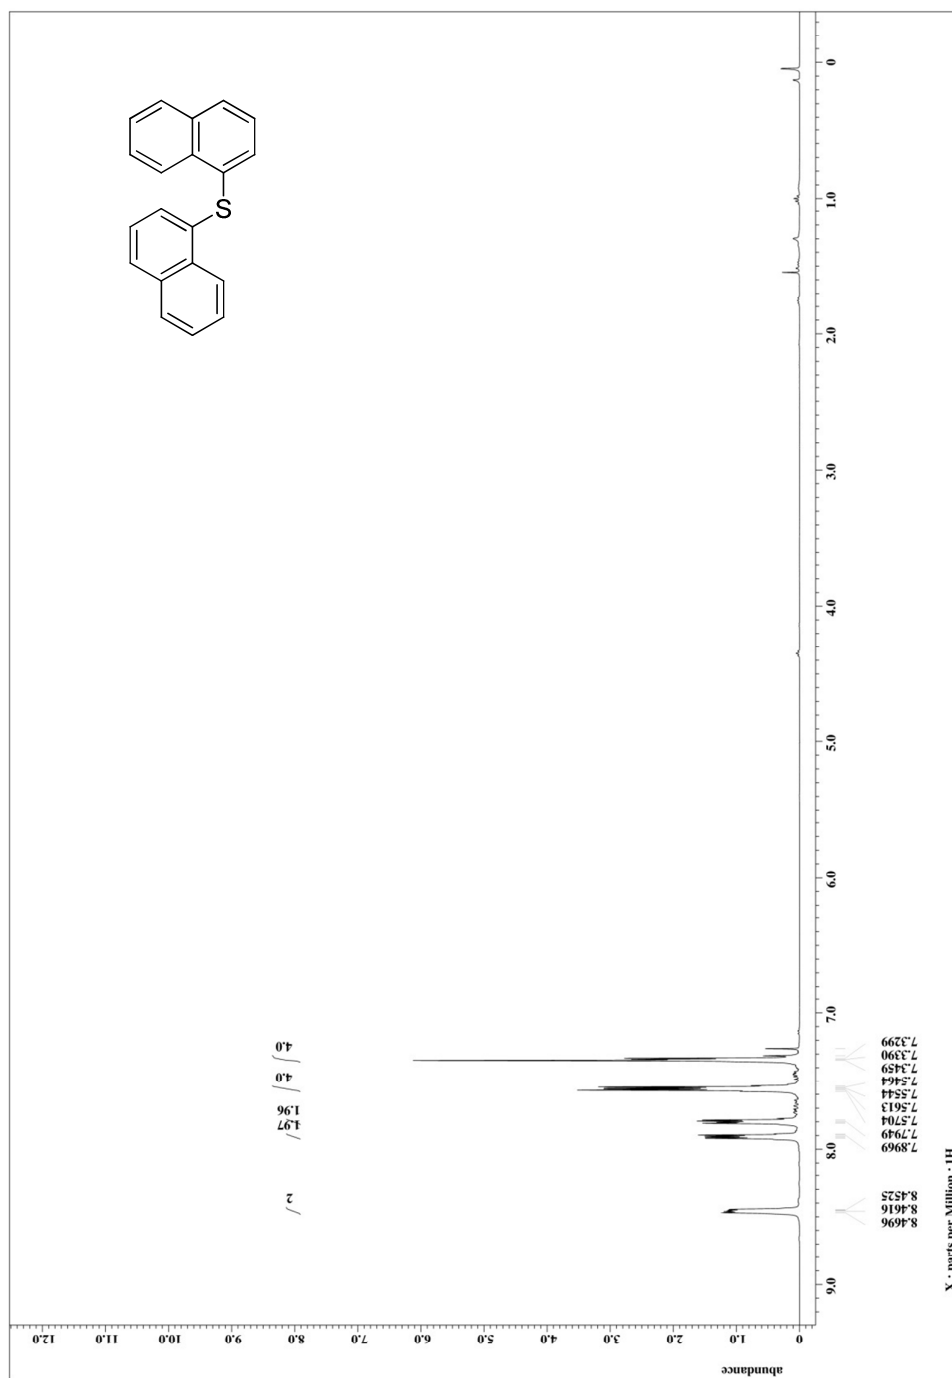

<sup>1</sup>H NMR of Compound 2o

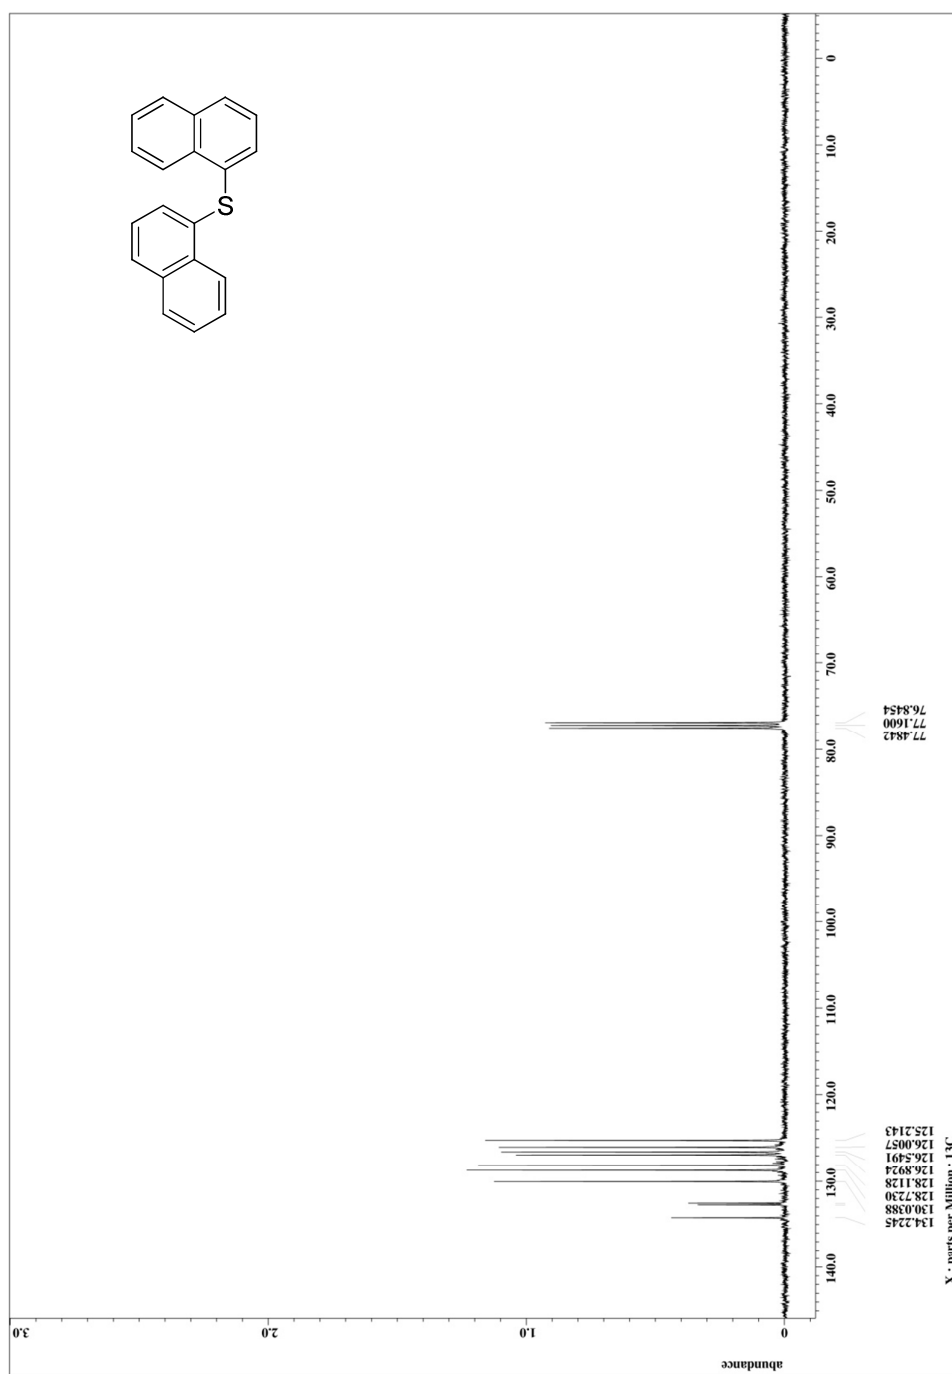

$^{13}\text{C}$  NMR of Compound **20**

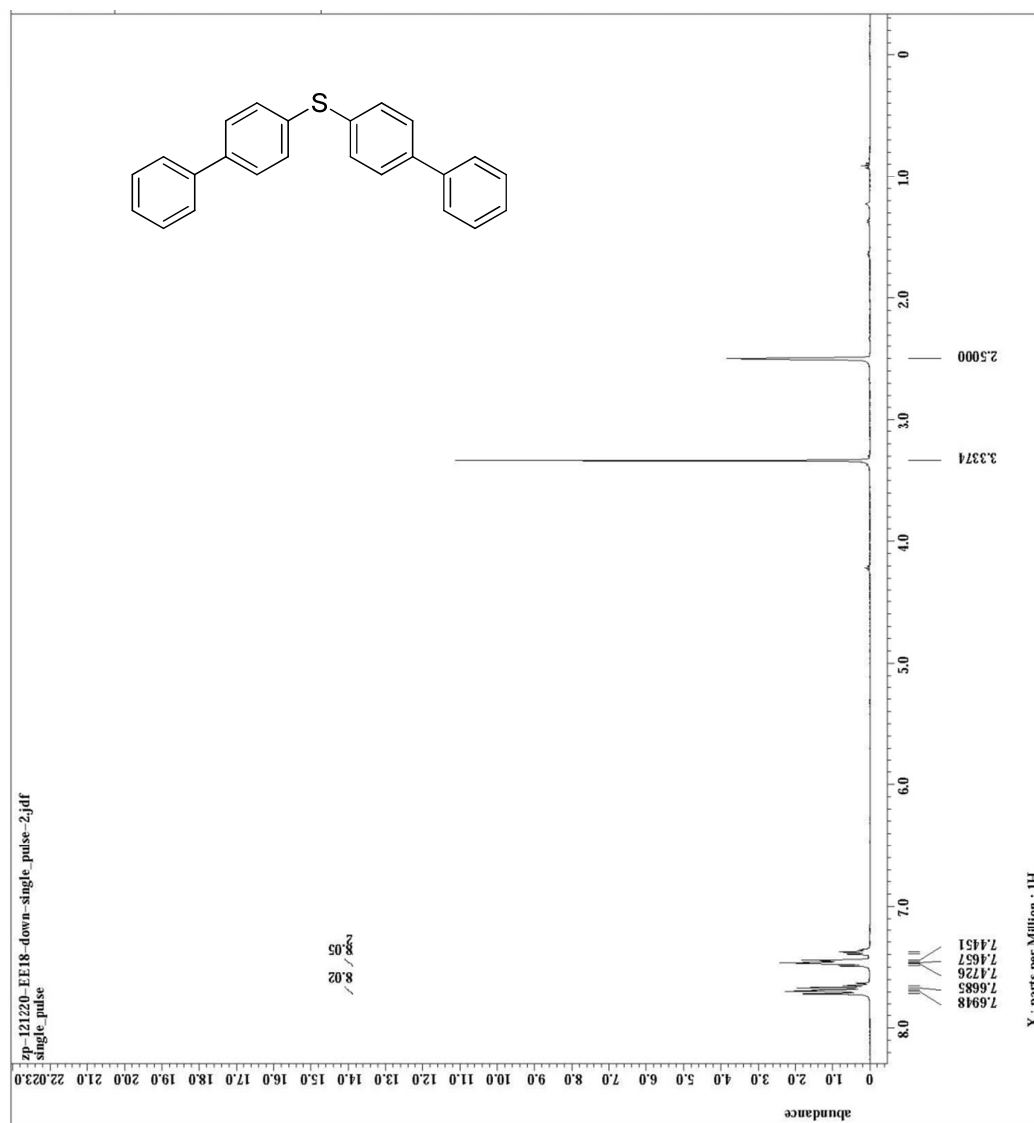

<sup>1</sup>H NMR of Compound **2p**



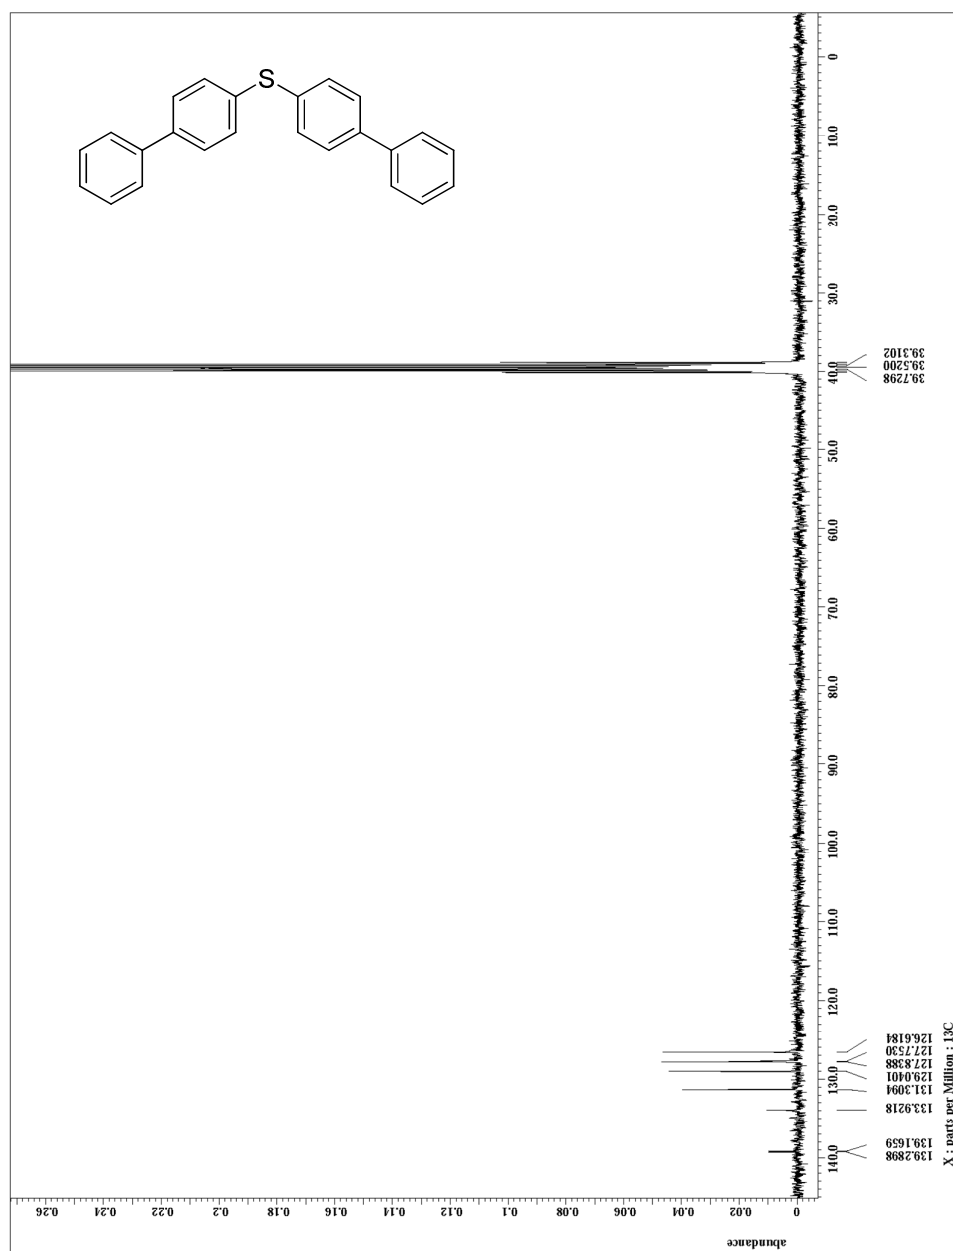

<sup>13</sup>C NMR of Compound 2p

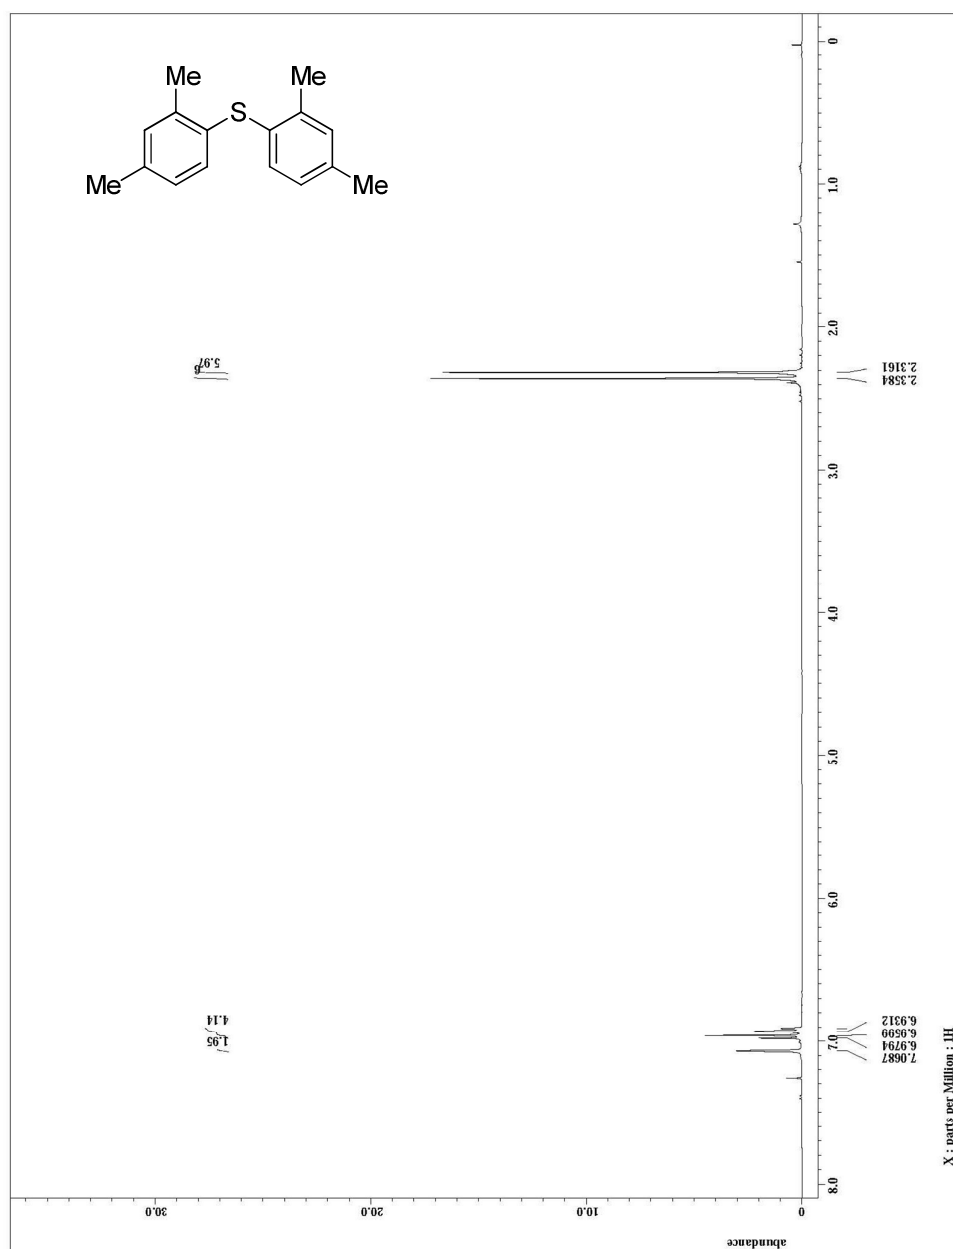

$^1\text{H}$  NMR of Compound **2q**

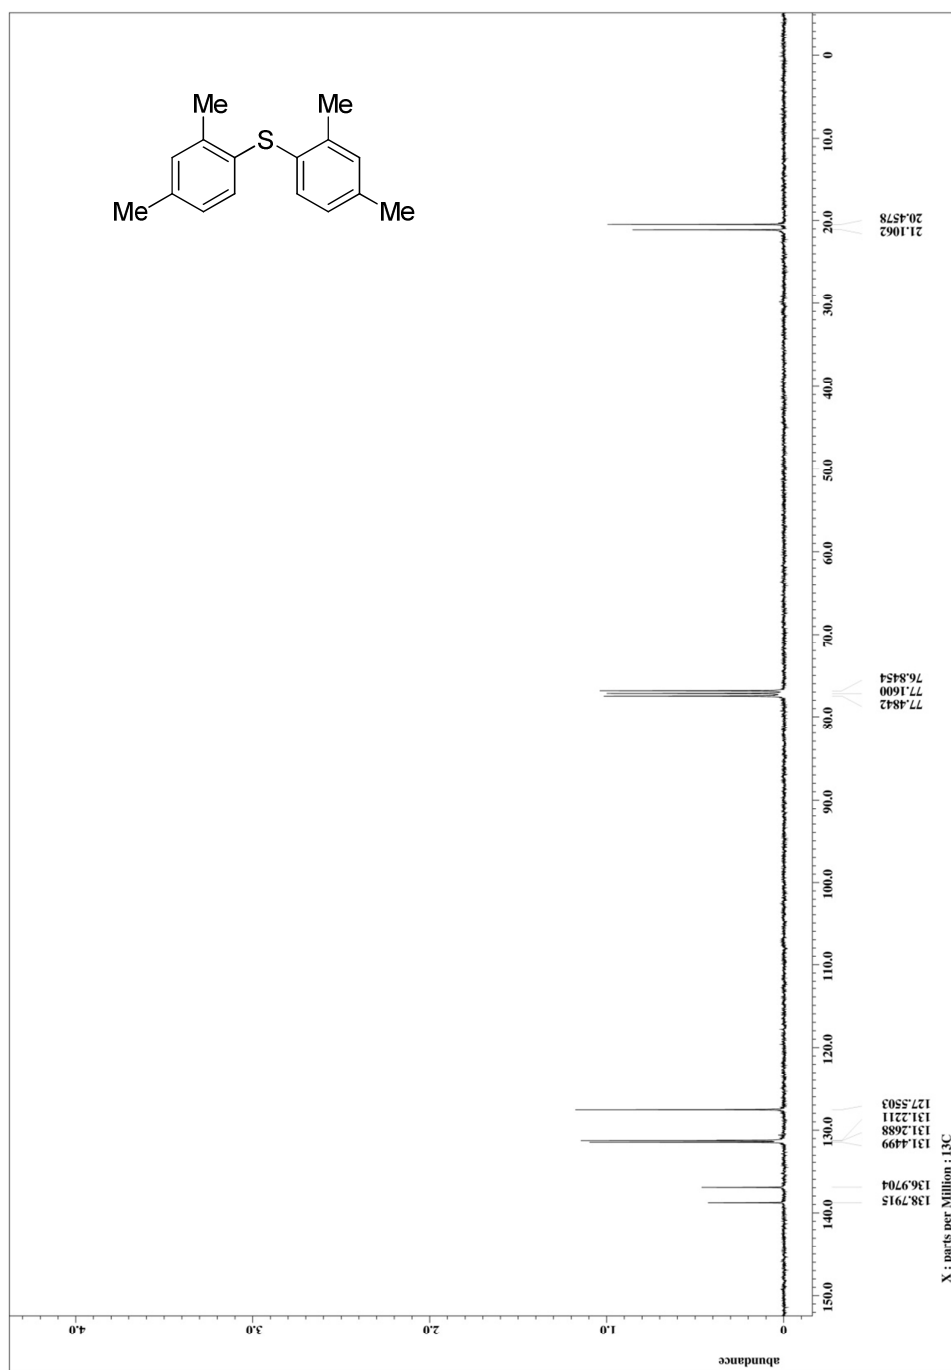

$^{13}\text{C}$  NMR of Compound 2q

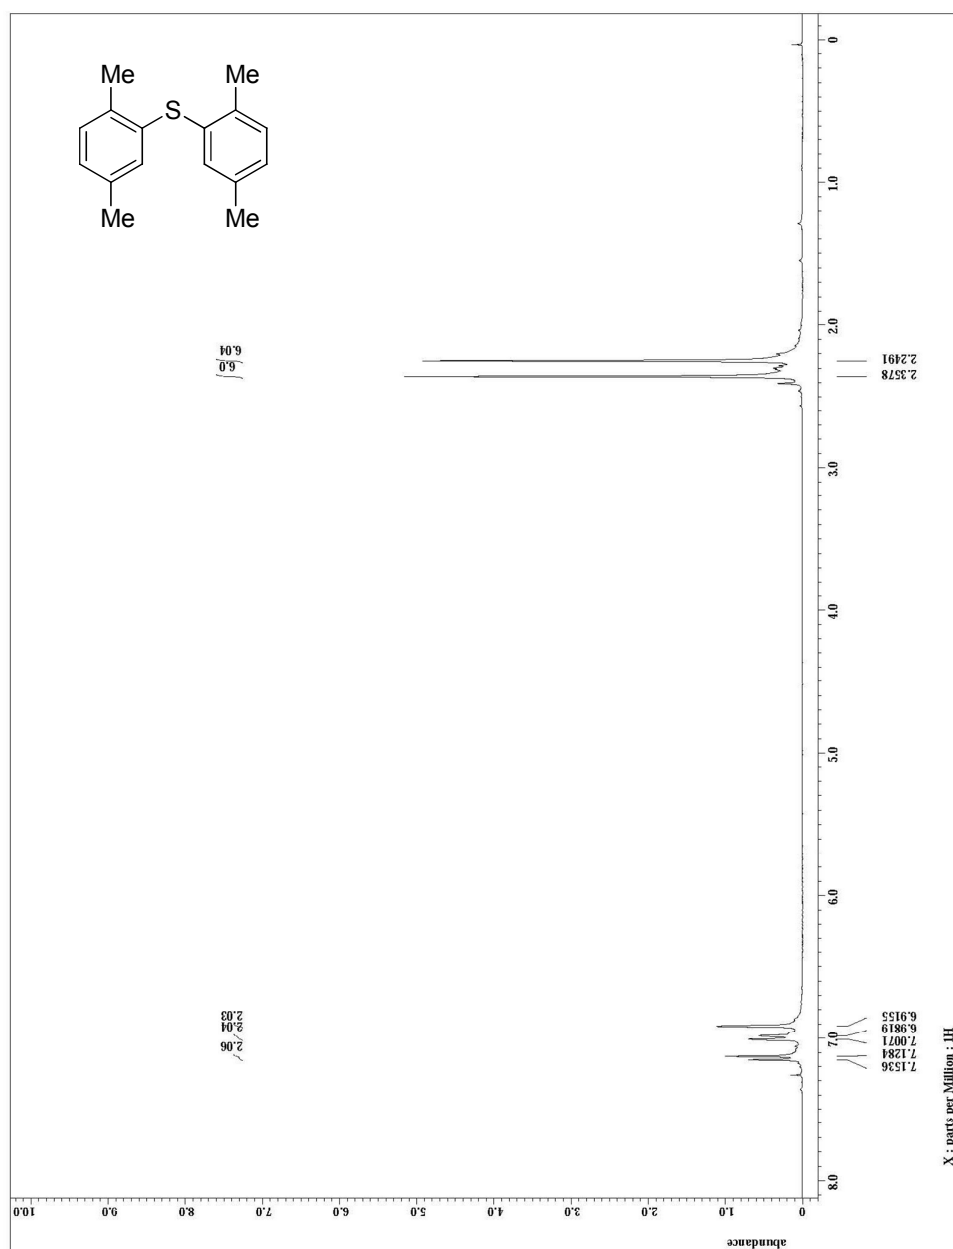

<sup>1</sup>H NMR of Compound 2r

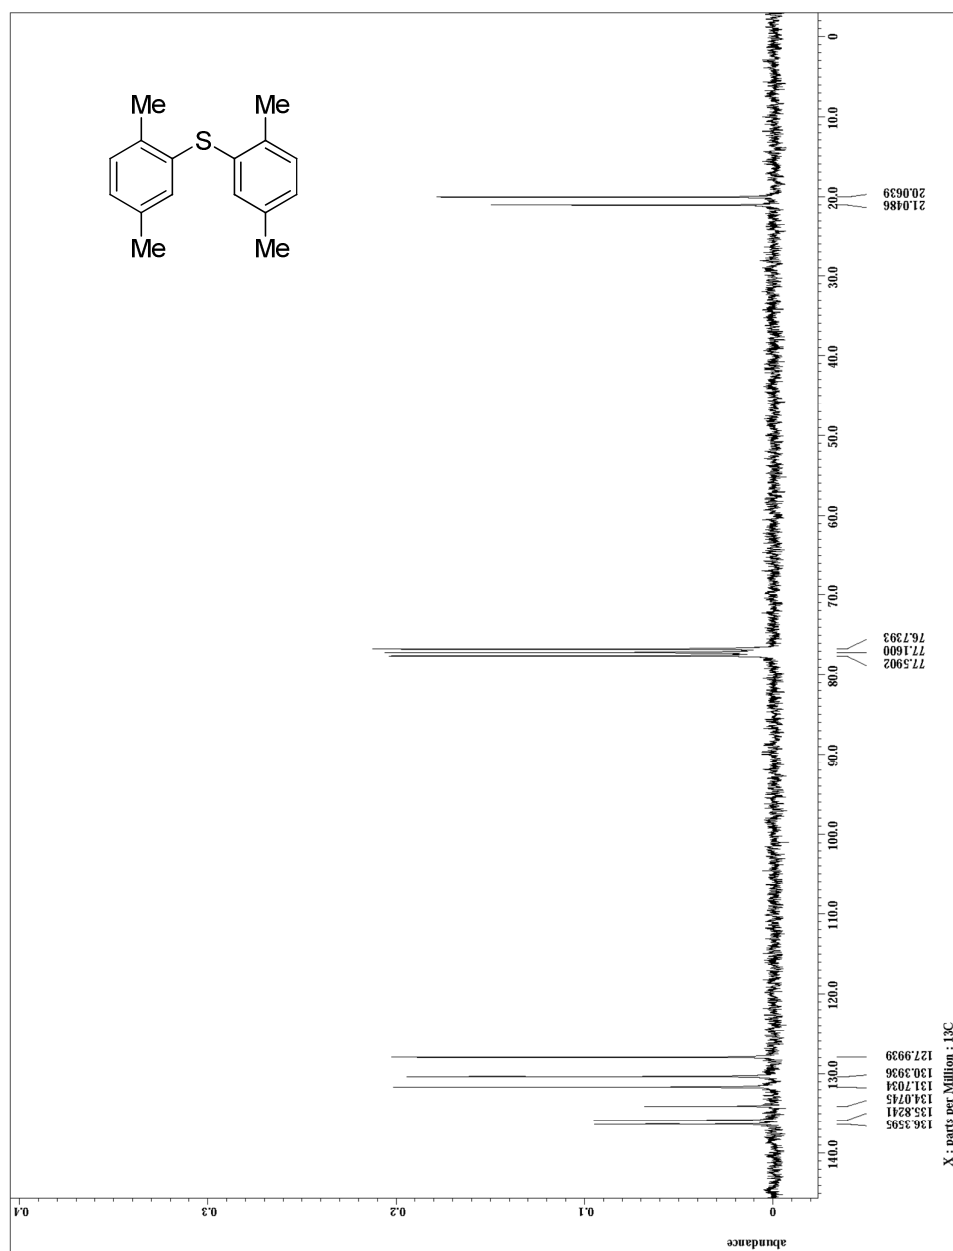

$^{13}\text{C}$  NMR of Compound **2r**

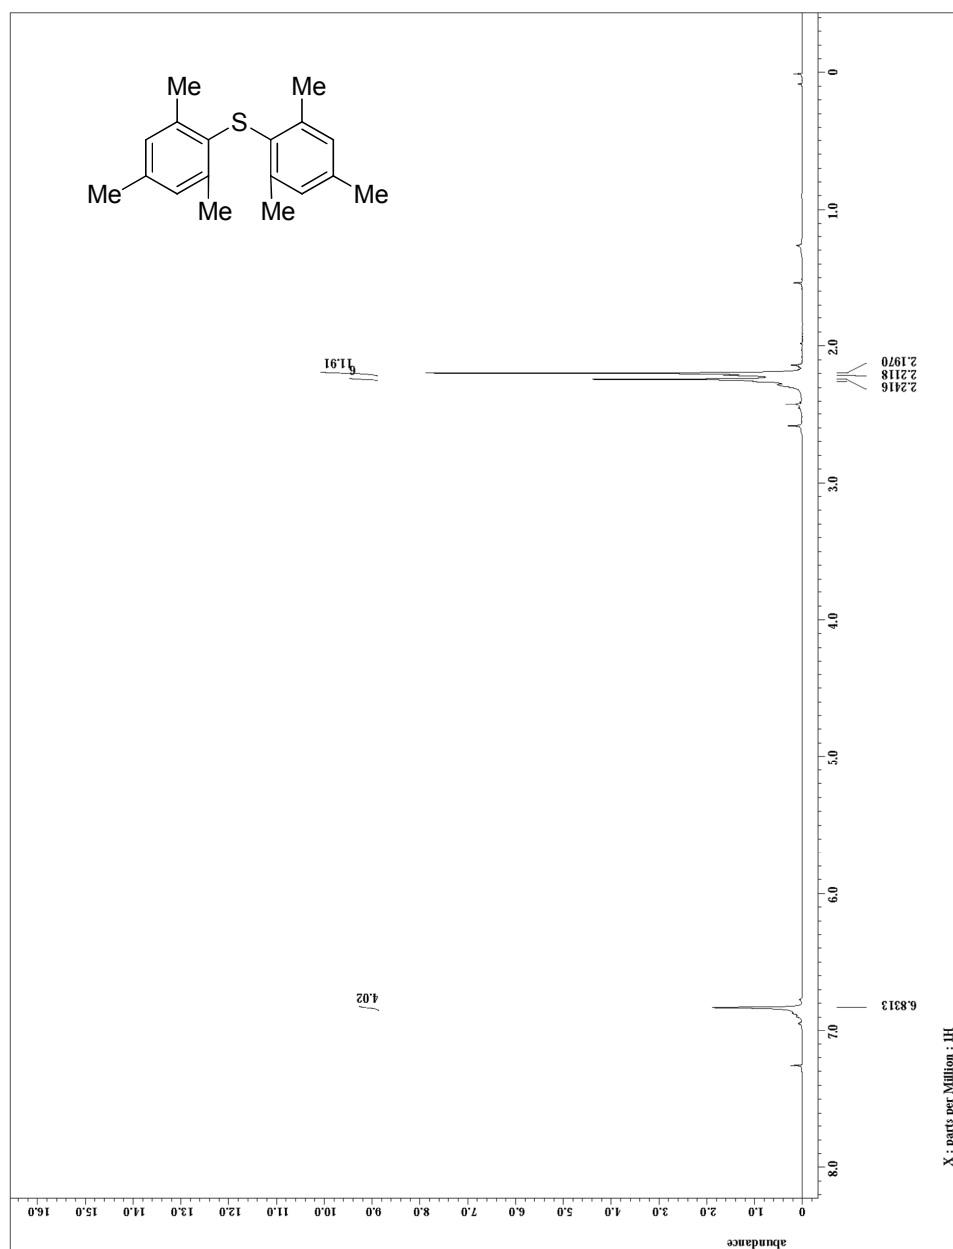

$^1\text{H}$  NMR of Compound 2s

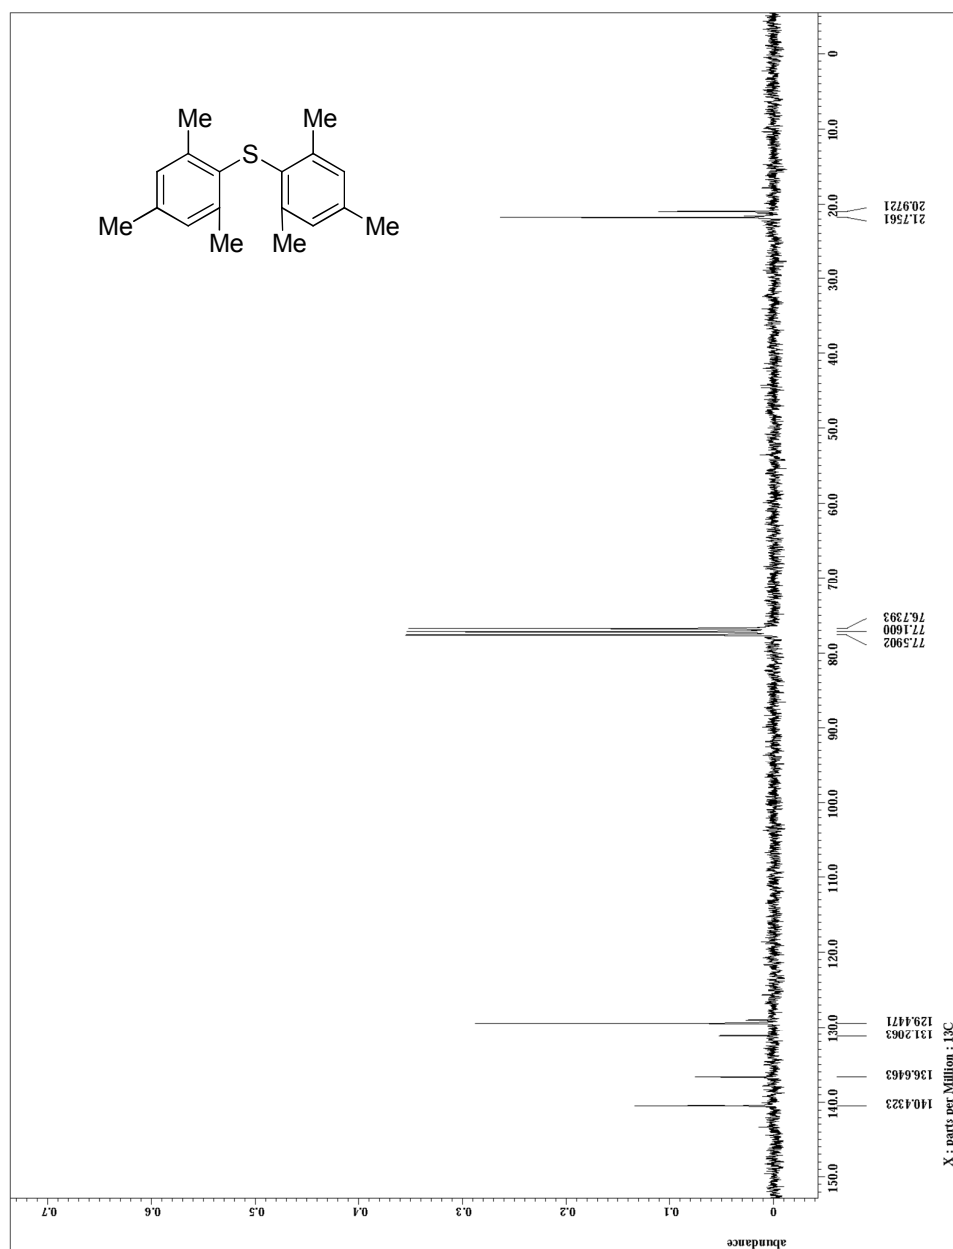

$^{13}\text{C}$  NMR of Compound **2s**

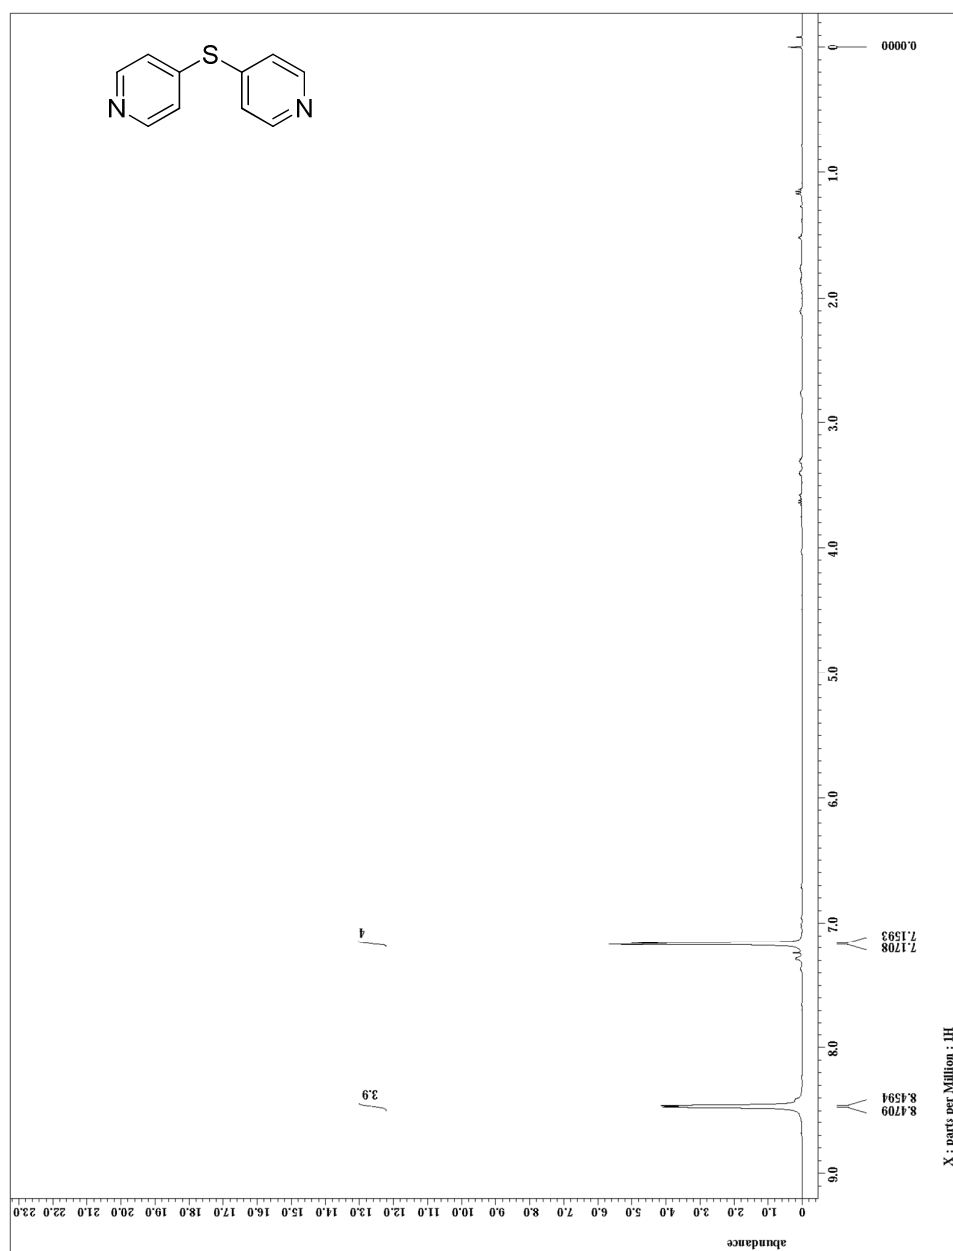

$^1\text{H}$  NMR of Compound **2t**



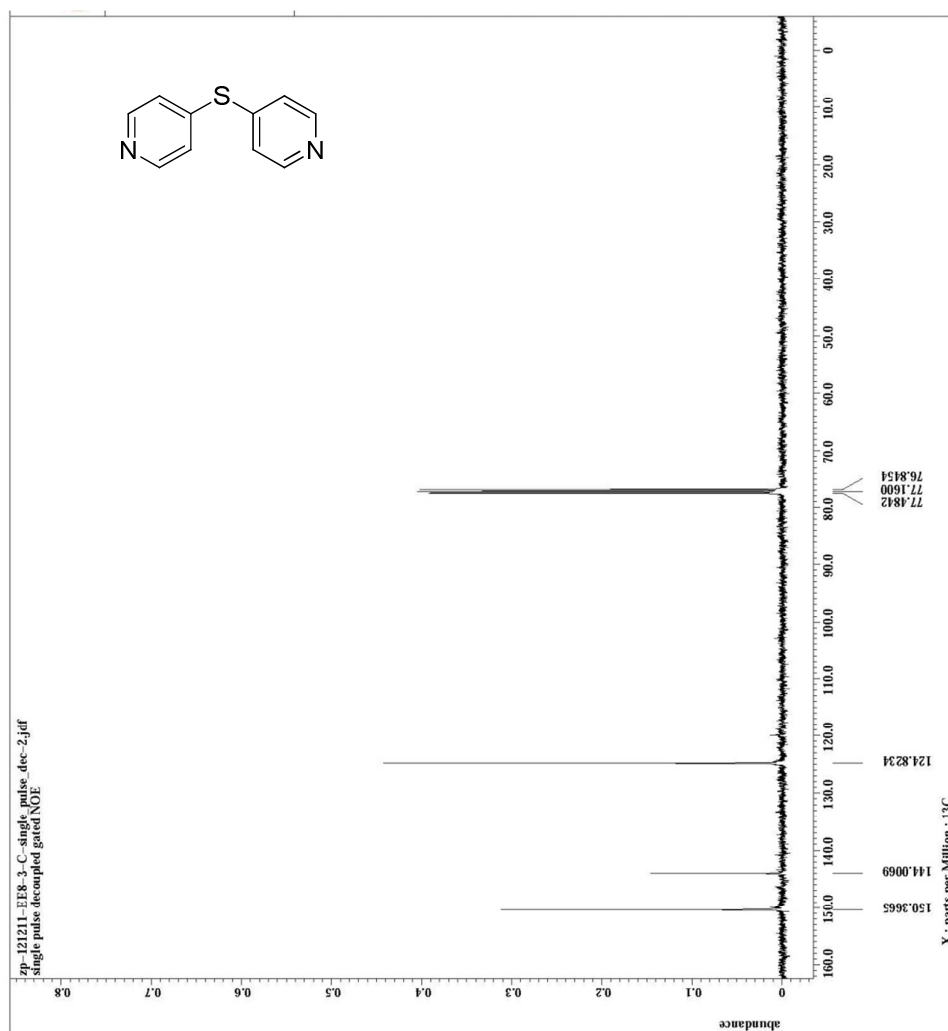

$^{13}\text{C}$  NMR of Compound **2t**

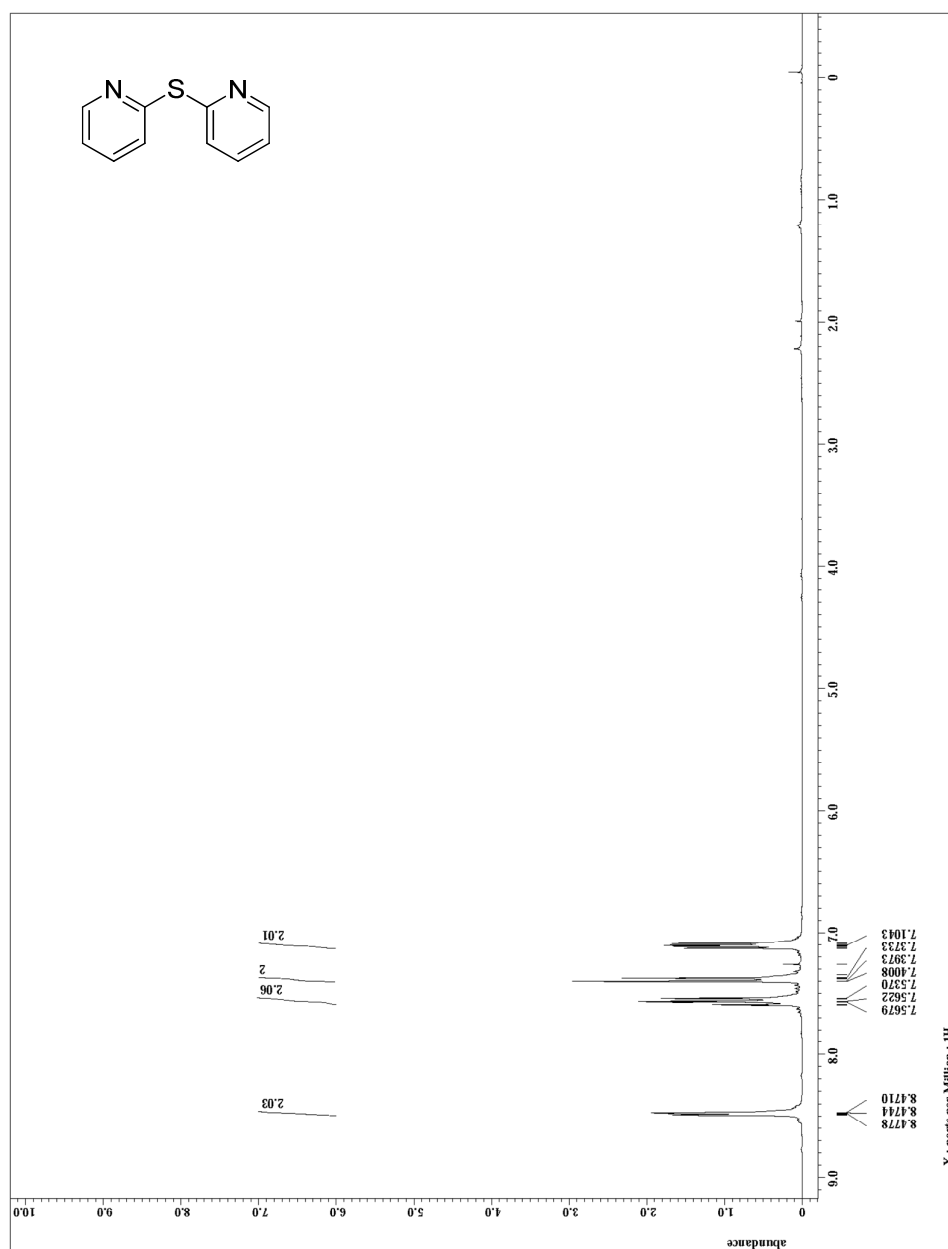

<sup>1</sup>H NMR of Compound **2u**

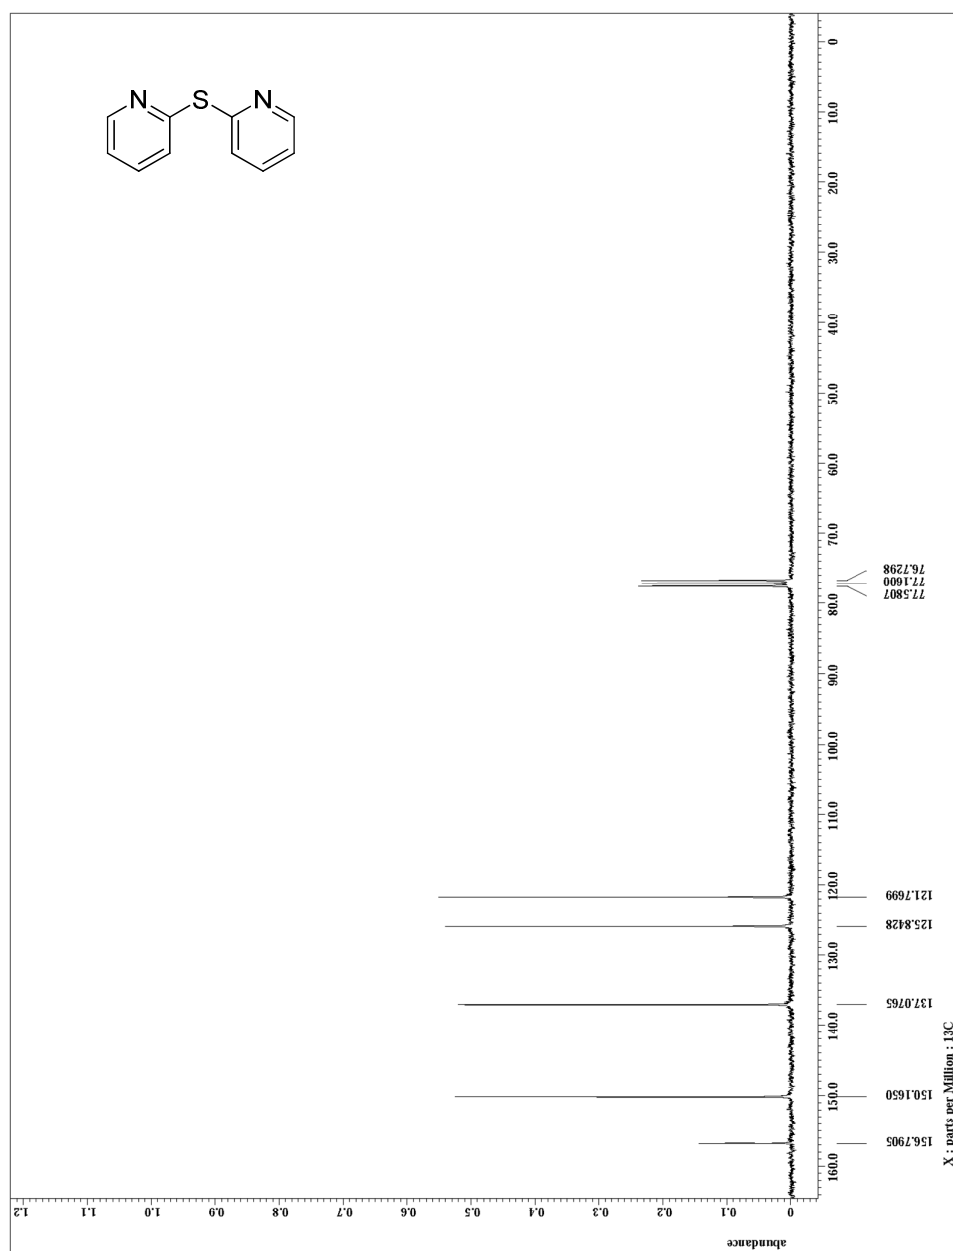

$^{13}\text{C}$  NMR of Compound **2u**

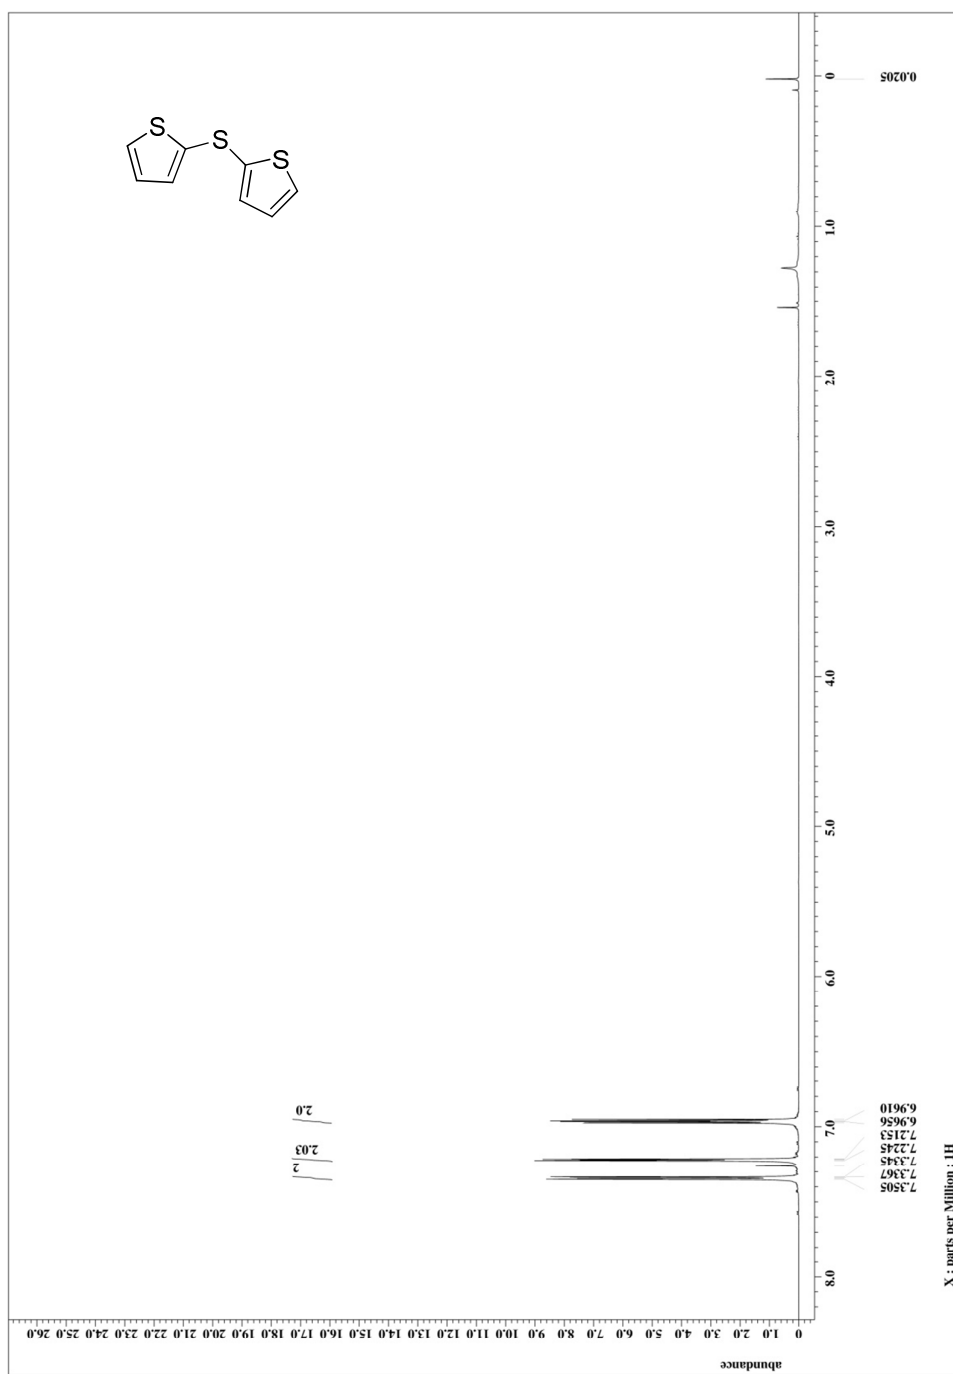

$^1\text{H}$  NMR of Compound **2v**

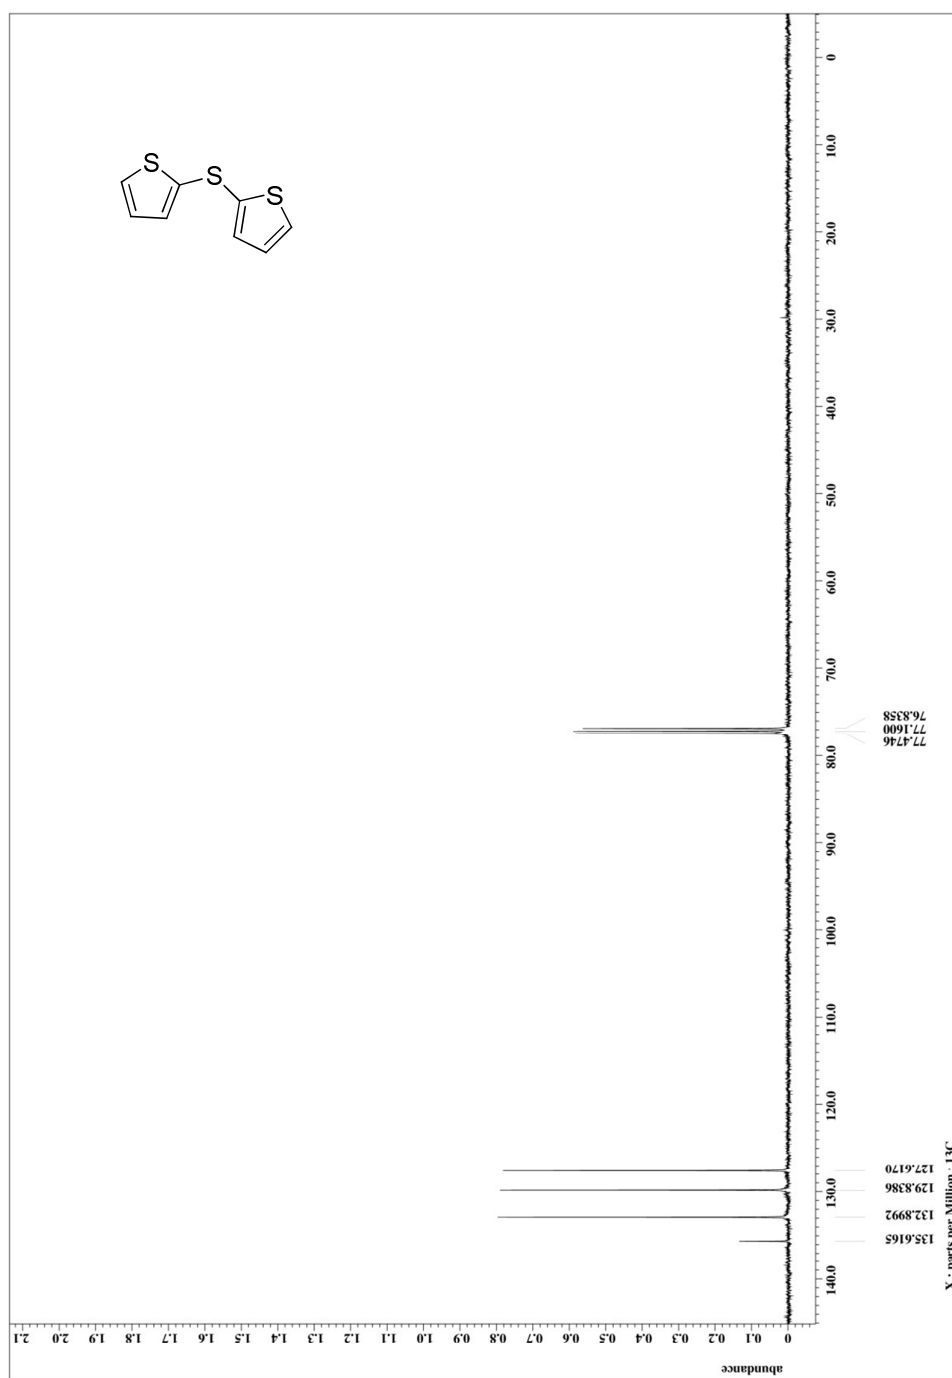

$^{13}\text{C}$  NMR of Compound **2v**

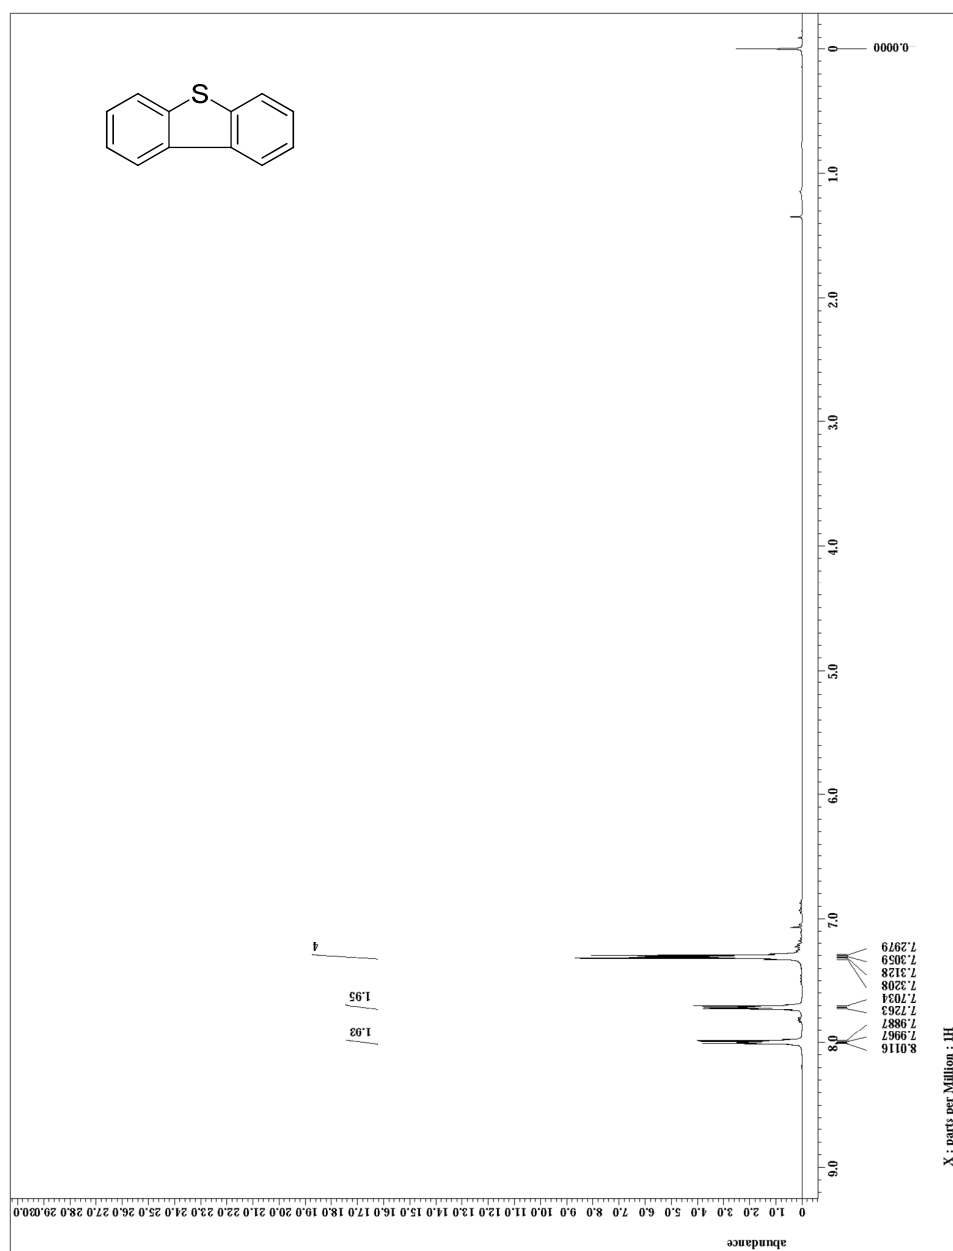

$^1\text{H}$  NMR of Compound **4a**

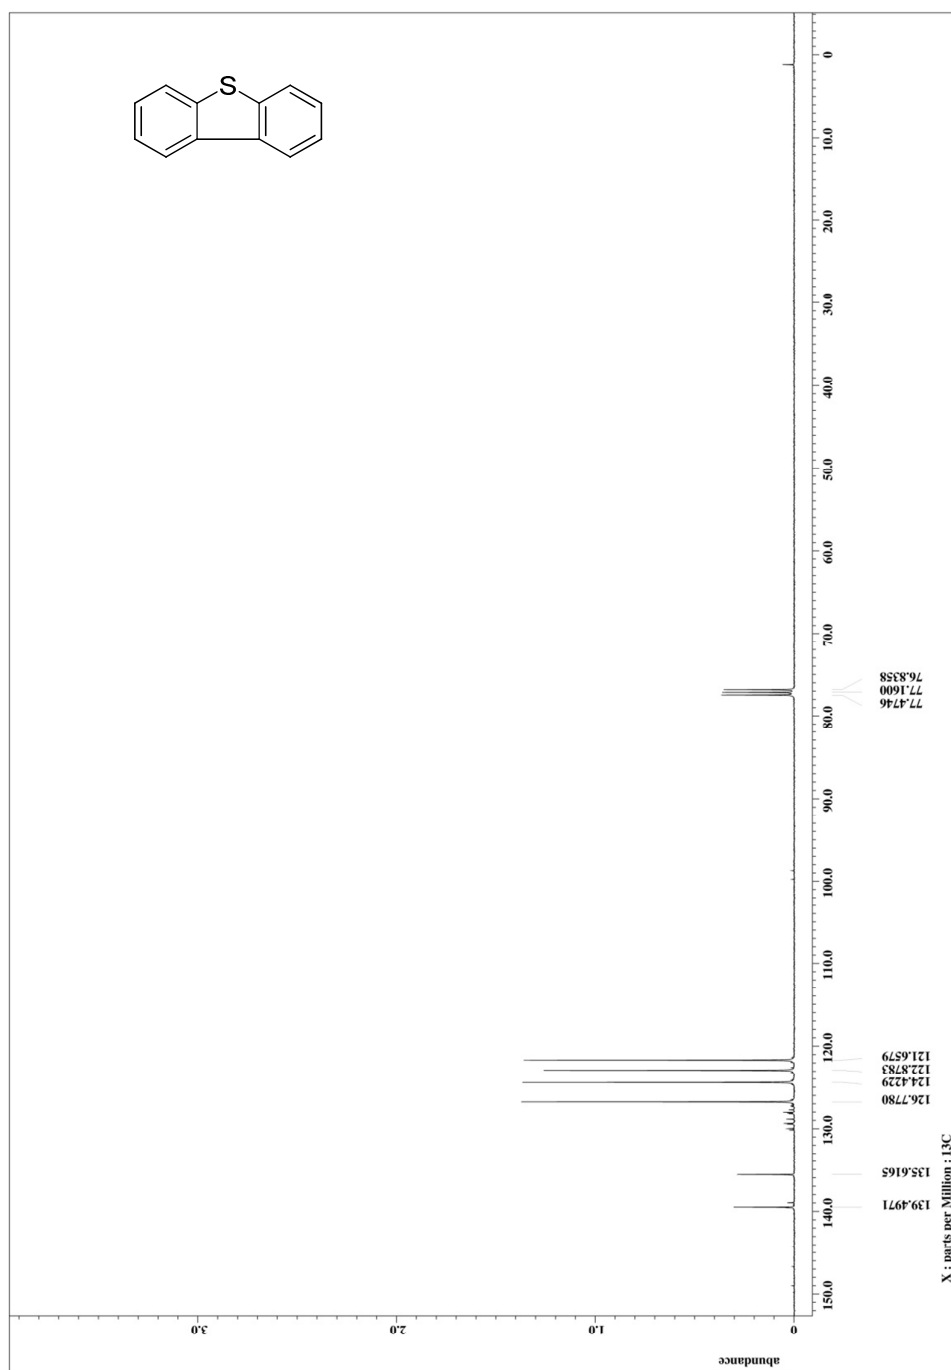

$^{13}\text{C}$  NMR of Compound 4a

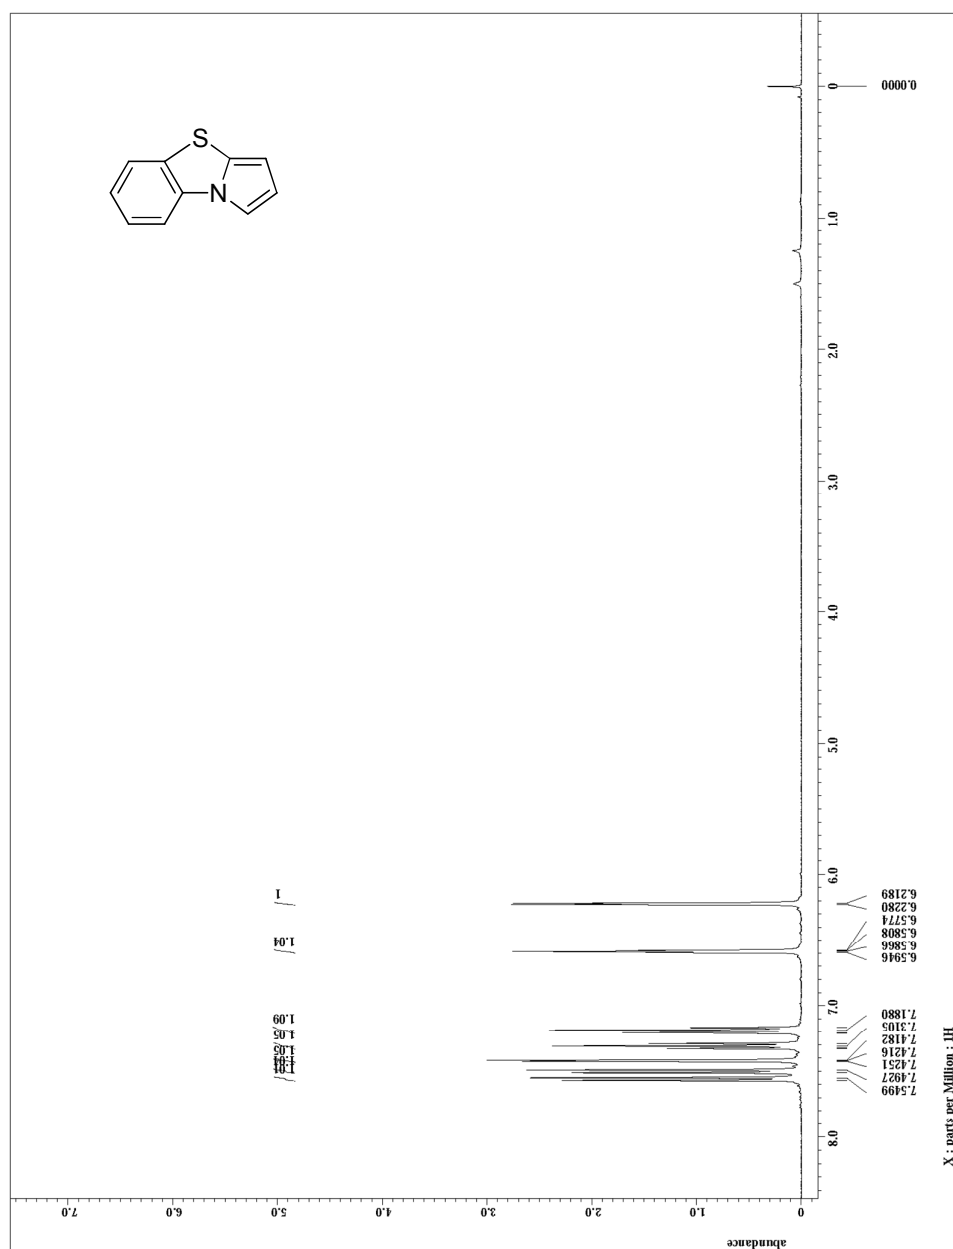

$^1\text{H}$  NMR of Compound **4b**



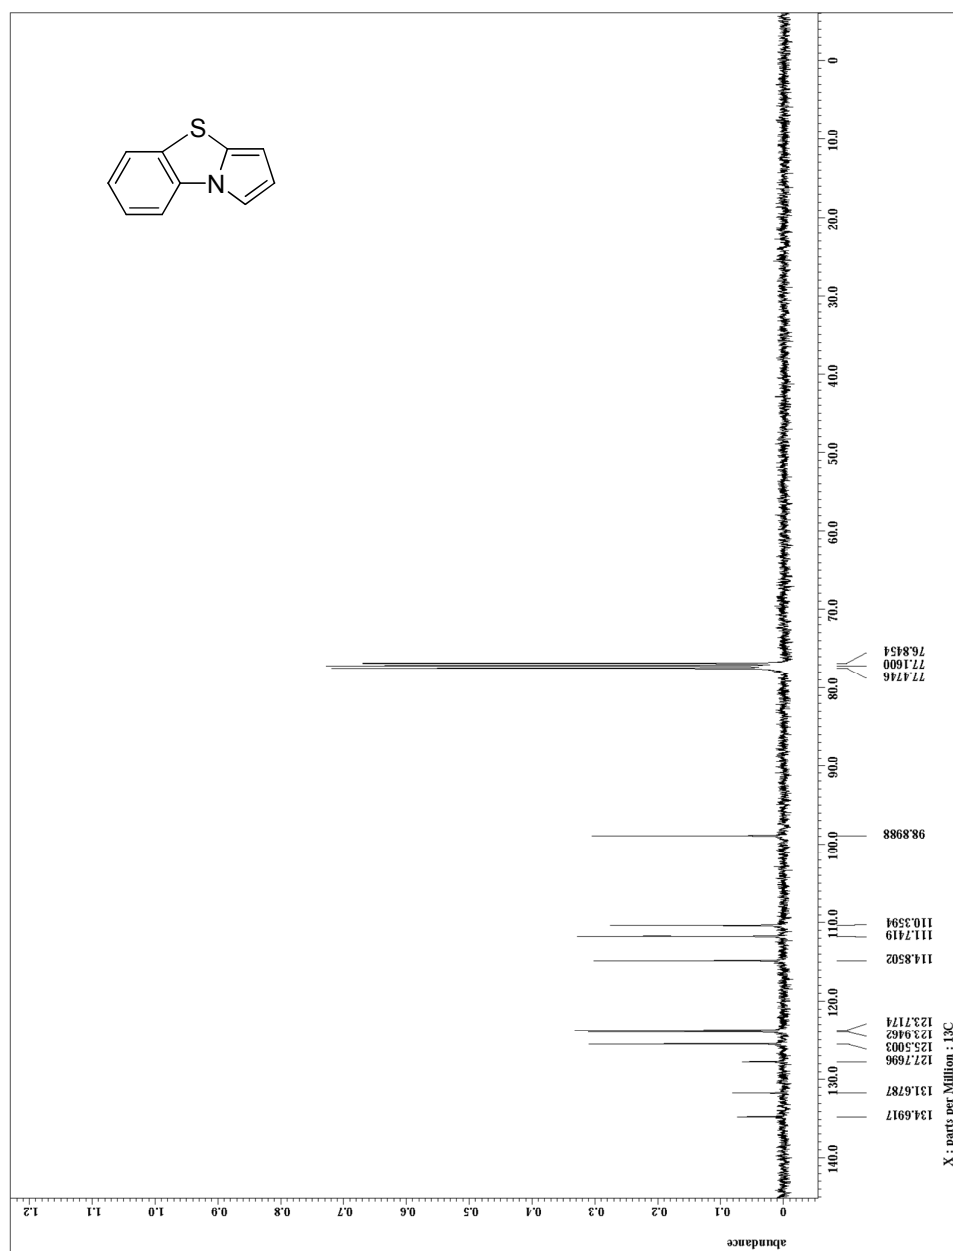

$^{13}\text{C}$  NMR of Compound **4b**

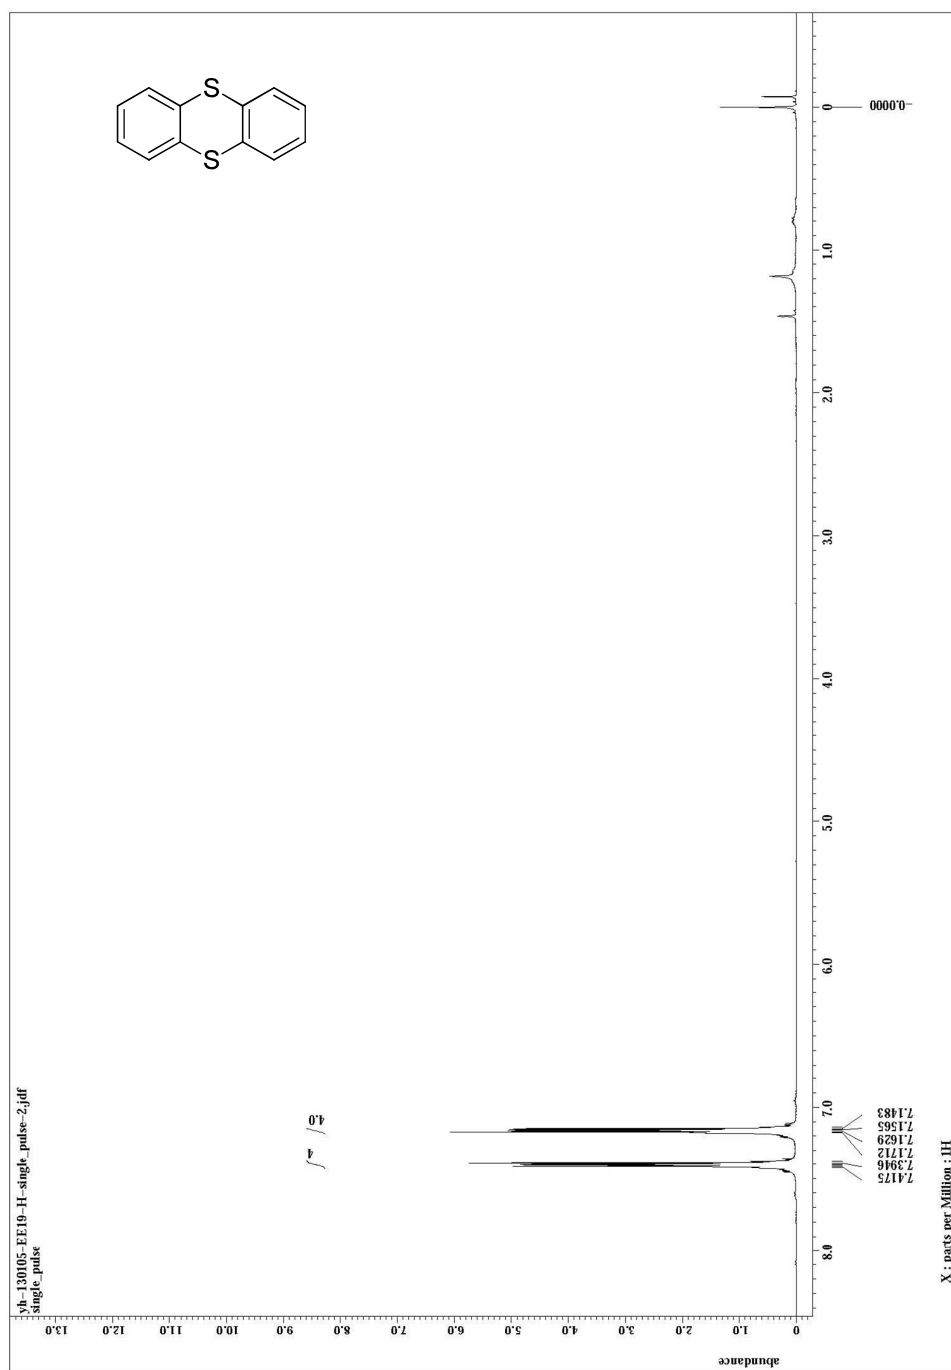

<sup>1</sup>H NMR of Compound 4c

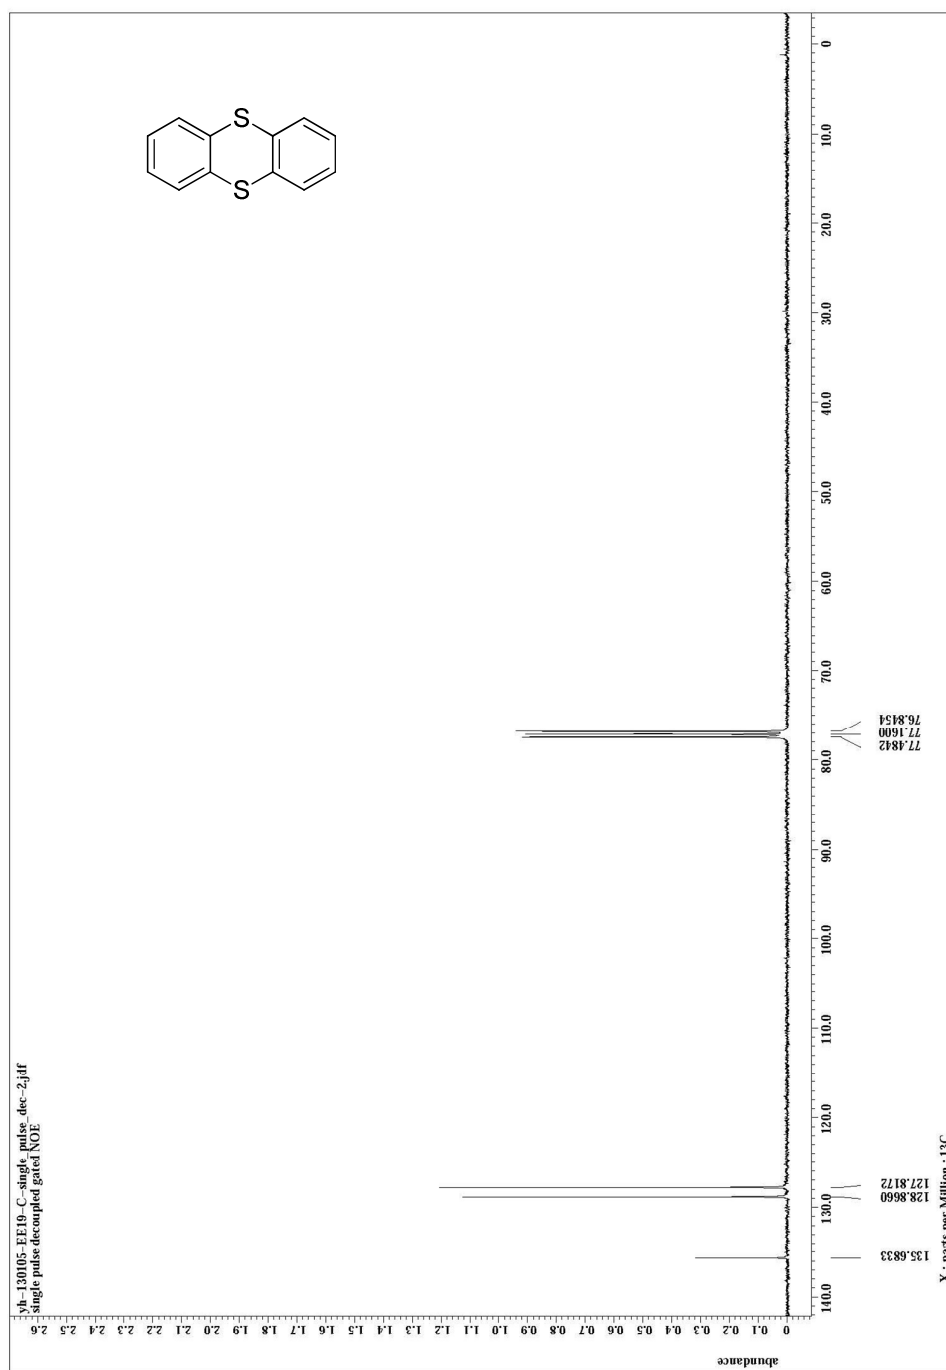

$^{13}\text{C}$  NMR of Compound **4c**

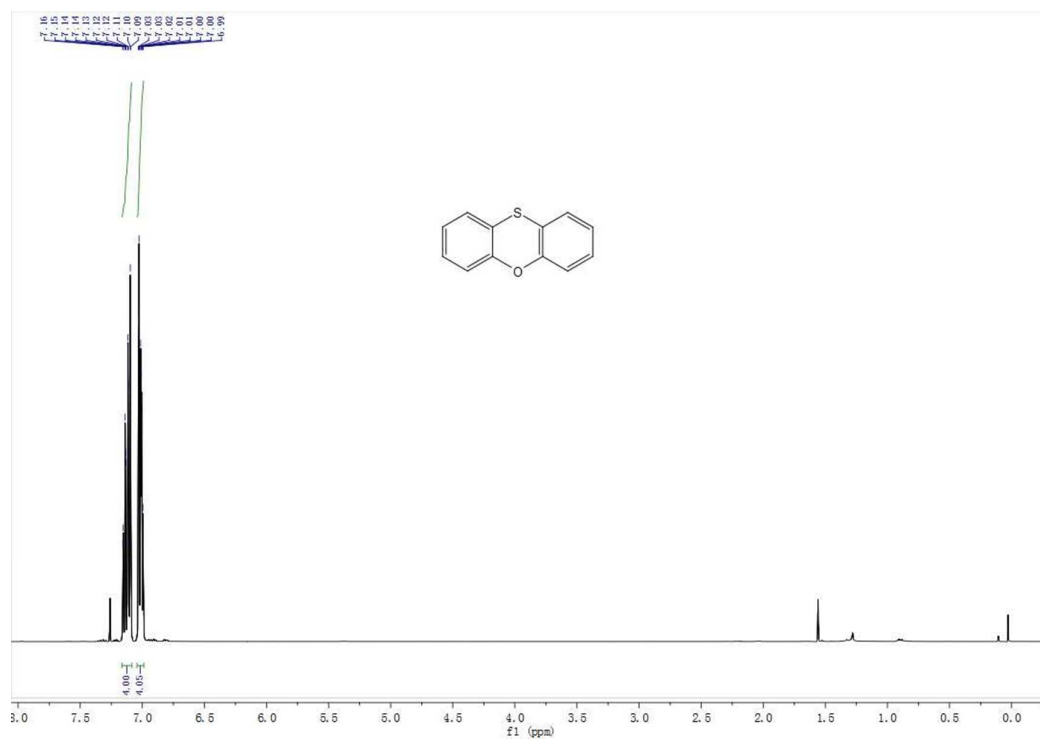

<sup>1</sup>H NMR of Compound **4d**

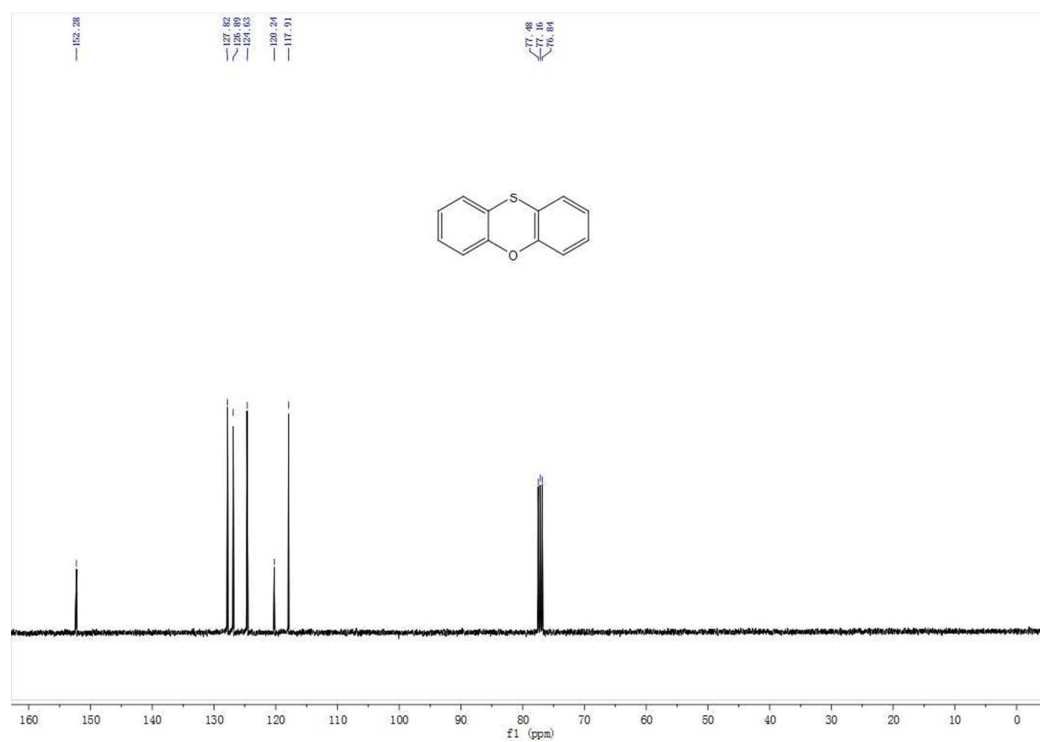

<sup>13</sup>C NMR of Compound **4d**

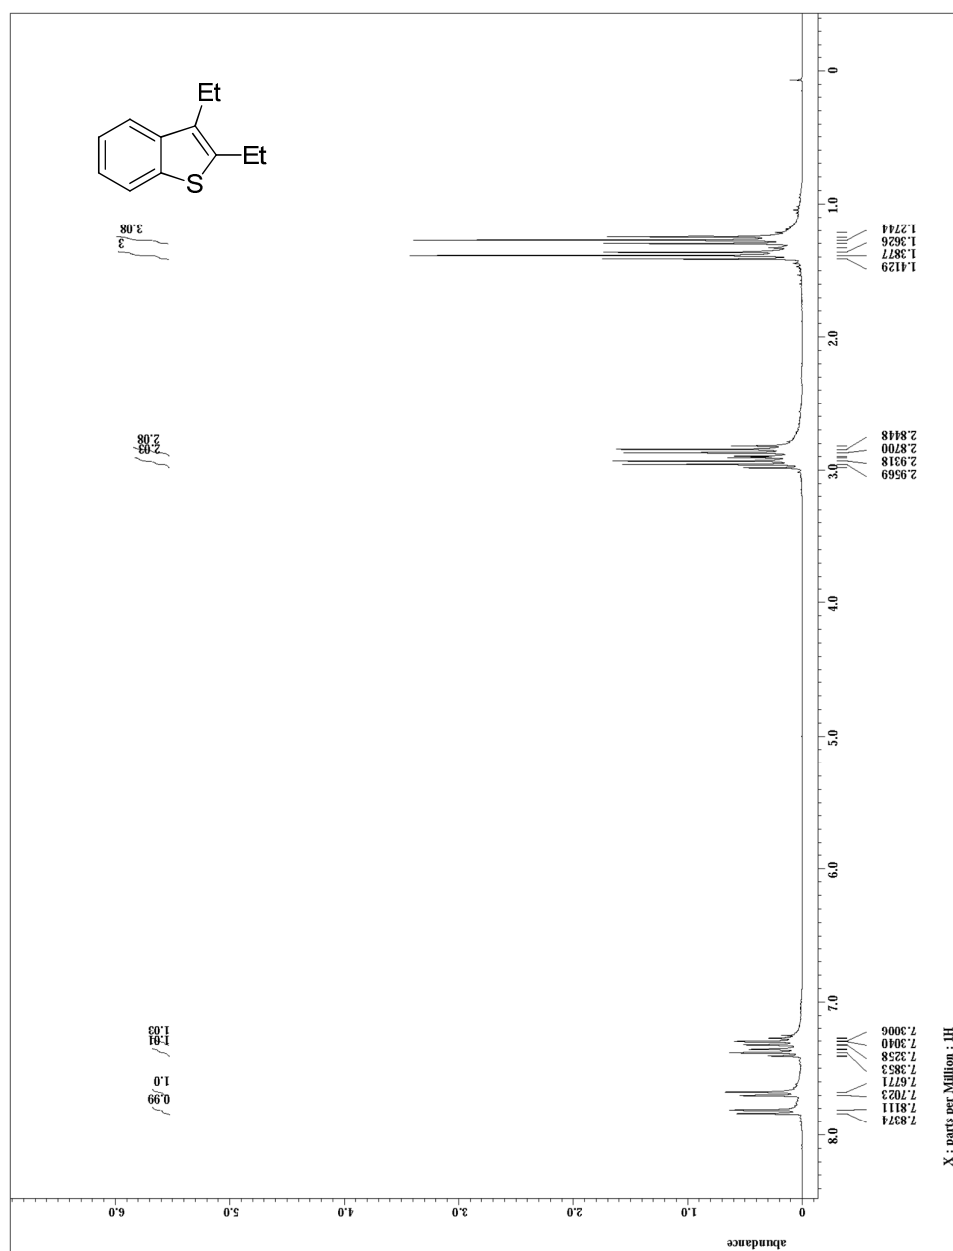

<sup>1</sup>H NMR of Compound **4e**

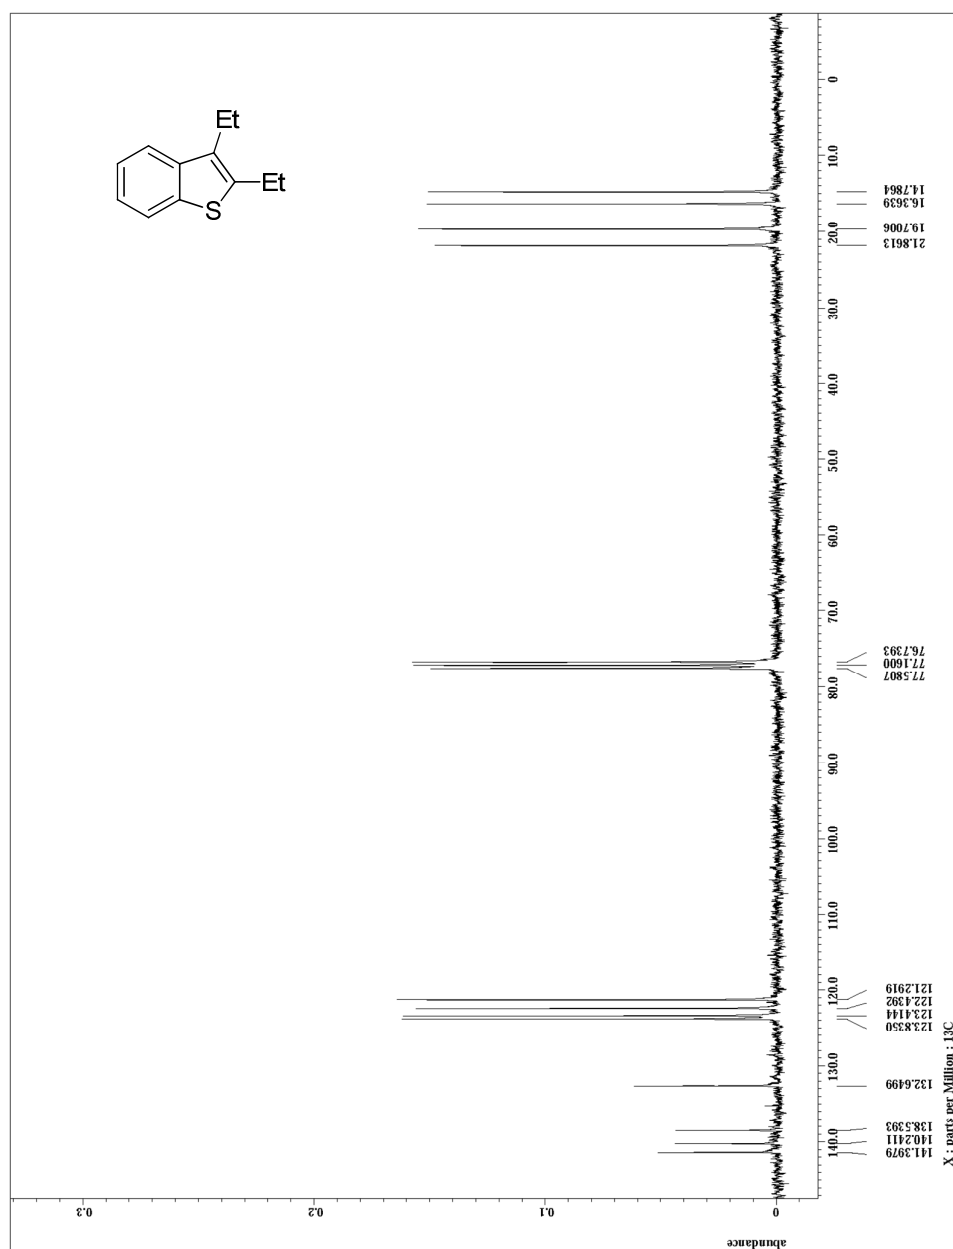

$^{13}\text{C}$  NMR of Compound **4e**

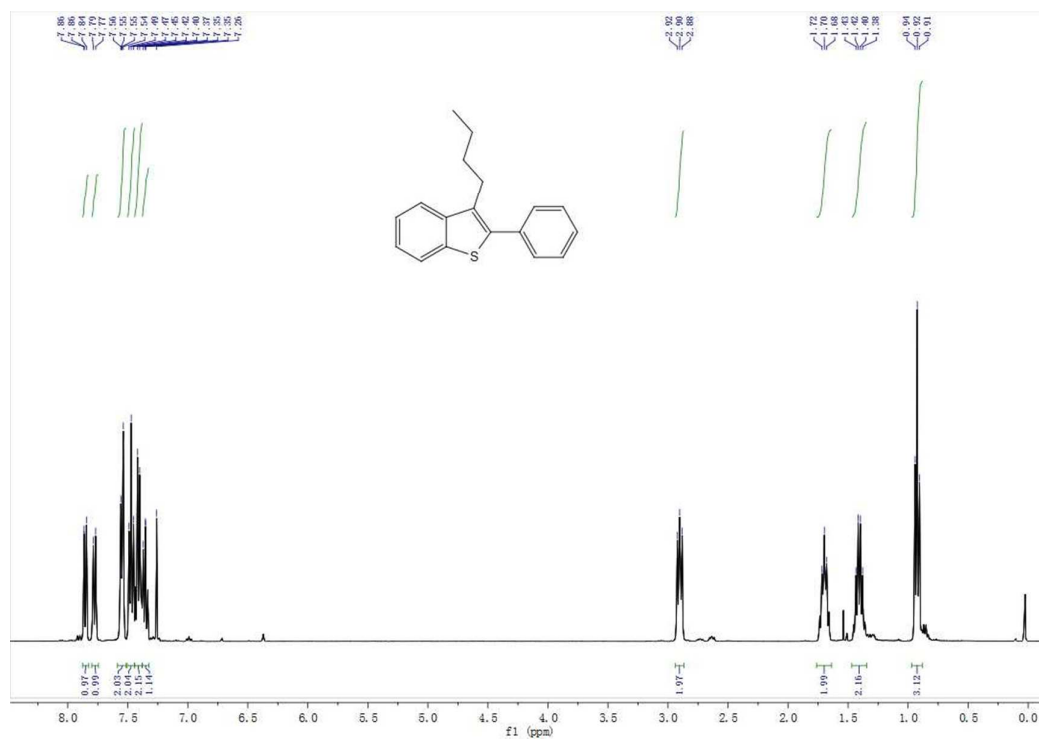

<sup>1</sup>H NMR of Compound 4f

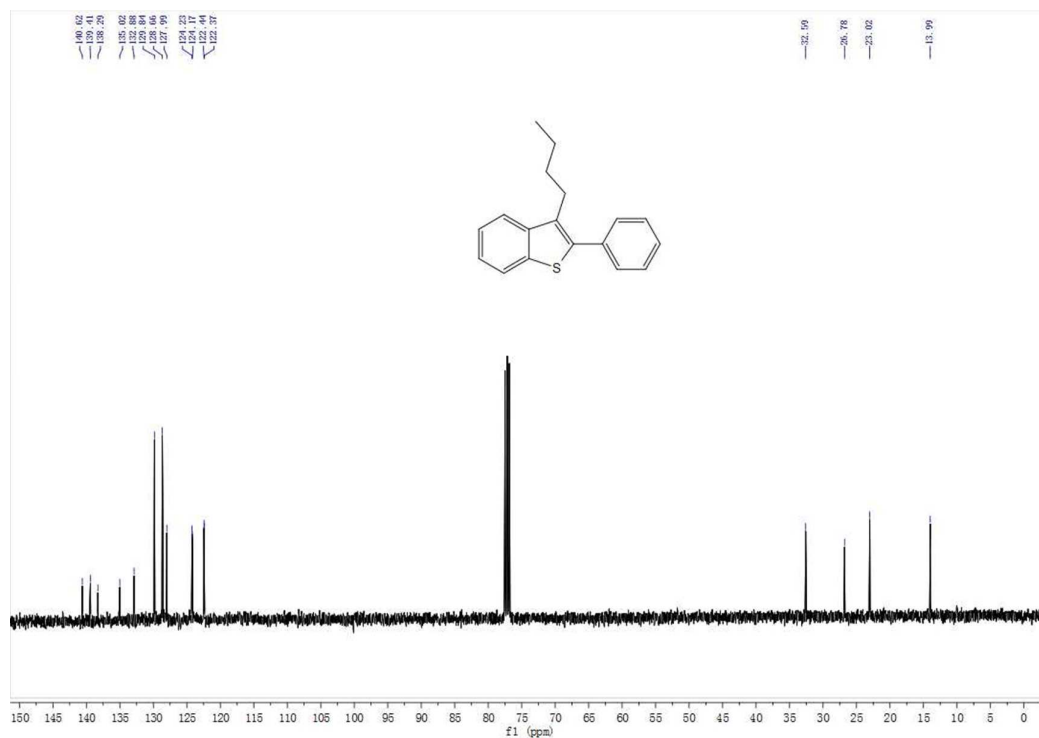

<sup>13</sup>C NMR of Compound 4f

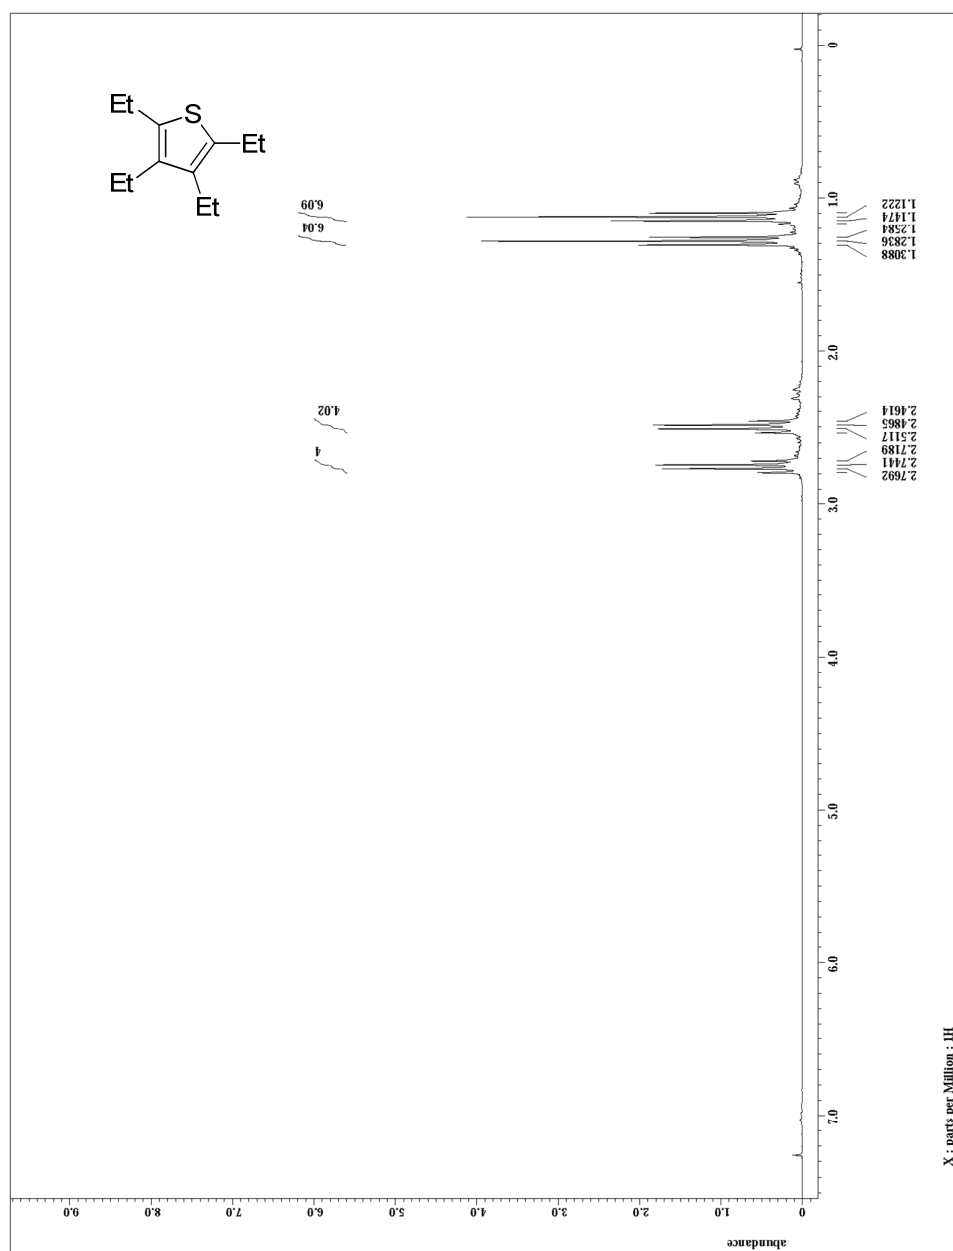

<sup>1</sup>H NMR of Compound **4g**



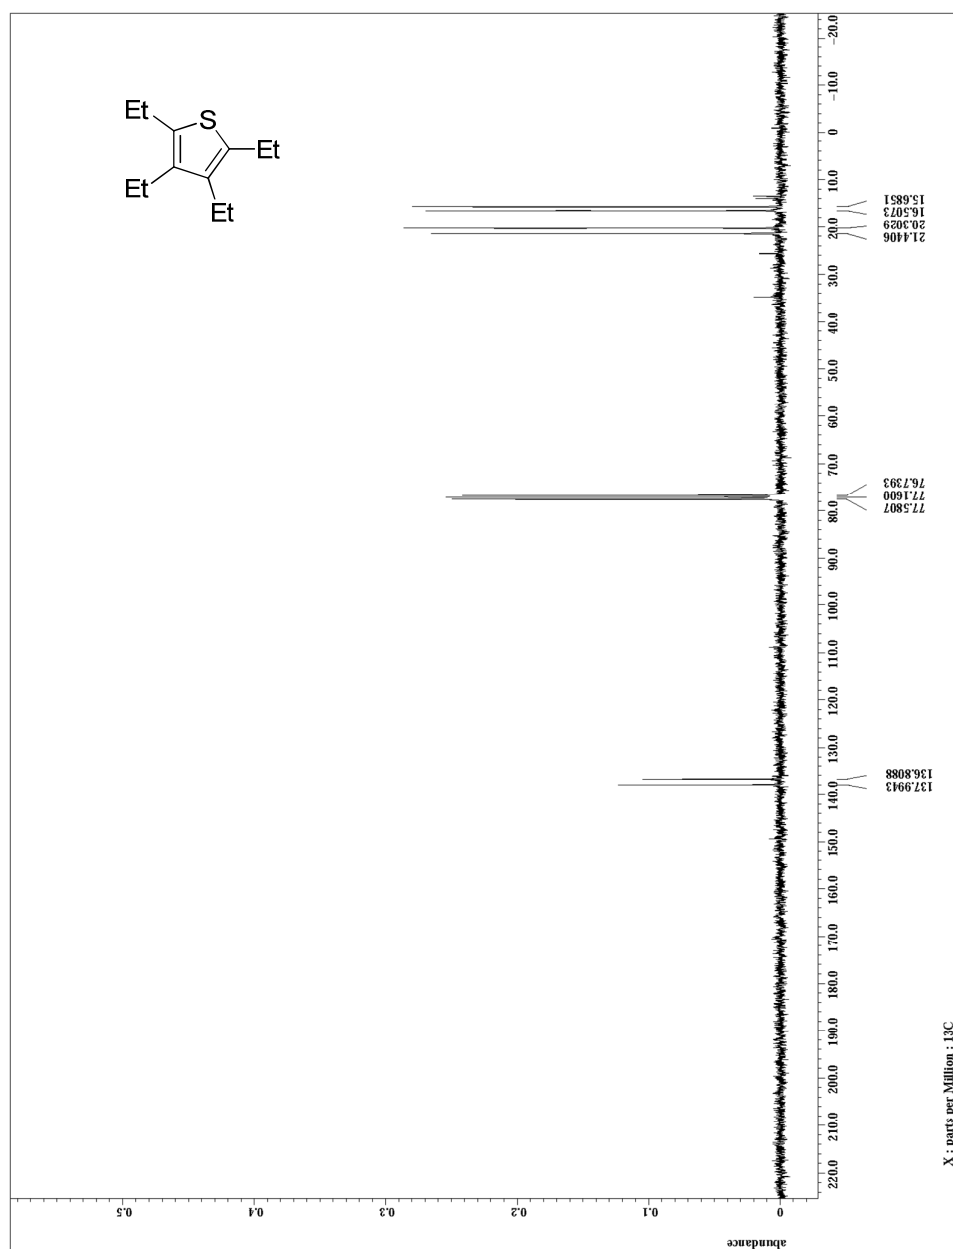

$^{13}\text{C}$  NMR of Compound **4g**

## 2. X-ray Crystal Structure of 2d

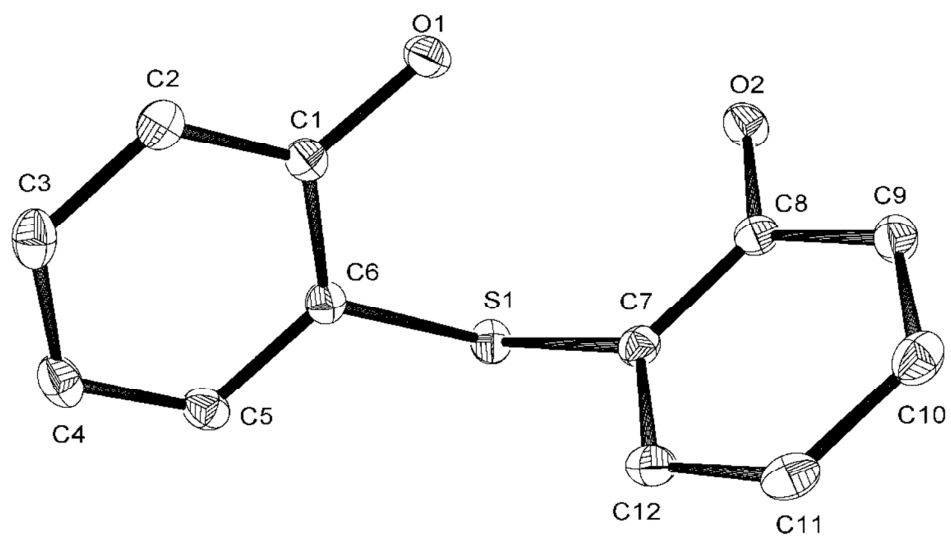

Supplement: Supplementary file 1 [file 4053859]
